# Supplementary material for: Catalyst- and solvent-free approach to 2-arylated quinolines via [5 + 1] annulation of 2-methylquinolines with diynones
Source: PubMed Central journal article supplement (PMC9077778; doi:10.1039/c7ra12716b), 2018-01-25

# Catalyst- and solvent-free approach to 2-arylated quinolines via [5+1] annulation of 2-methylquinolines with diynones

(Electronic Supplementary Information)

Hai-Yuan Zhao<sup>a,b†</sup>, Fu-Song Wu<sup>b†</sup>, Li Yang<sup>c</sup>, Ying Liang<sup>a\*</sup>, Xiao-Lin Cao<sup>b</sup>, Heng-Shan Wang<sup>b</sup> and Ying-Ming Pan<sup>b\*</sup>

<sup>a</sup> School of Life and Environmental Sciences, Guilin University of Electronic Technology, Guilin, 541004, (China)

<sup>b</sup> State Key Laboratory for Chemistry and Molecular Engineering of Medicinal Resources, School of Chemistry and Pharmaceutical Sciences of Guangxi Normal University, Guilin 541004 (China)

<sup>c</sup> Guangxi Key Laboratory of Special Non-wood Forest Cultivation and Utilization, Guangxi Zhuang Autonomous Region Forestry Research Institute, Nanning, 530002 (China)

†These authors contributed equally to this work.

## Table of Contents

|                                                                                          |     |
|------------------------------------------------------------------------------------------|-----|
| <b>General methods and materials</b> .....                                               | S2  |
| <b>Procedure of synthesis of starting materials 1</b> .....                              | S2  |
| <b>Synthesis of 4-(quinolin-2-yl)phenol Derivatives 3a-3c, 3e-3f, 3i, 3k-3z</b> .....    | S3  |
| <b>Synthesis of 4-(quinolin-2-yl)phenol Derivatives 3d, 3g, 3h, and 3j</b> .....         | S3  |
| <b>References</b> .....                                                                  | S3  |
| <b>Spectral data of all compounds</b> .....                                              | S4  |
| <b>Copies of <sup>1</sup>H NMR and <sup>13</sup>C NMR spectra of all compounds</b> ..... | S17 |

**General methods and materials.** Proton nuclear magnetic resonance spectra ( $^1\text{H}$  NMR) and carbon nuclear magnetic resonance spectra ( $^{13}\text{C}$  NMR) were recorded at 400 MHz and 100 MHz or 500 MHz and 125 MHz, respectively, using DMSO- $d_6$  as reference standard ( $\delta$  2.50 ppm) for  $^1\text{H}$  NMR and ( $\delta$  40.00 ppm) for  $^{13}\text{C}$  NMR or  $\text{CDCl}_3$  as reference standard ( $\delta$  7.26 ppm) for  $^1\text{H}$  NMR and ( $\delta$  77.00 ppm) for  $^{13}\text{C}$  NMR. HRMS (ion trap) were recorded using ESI. Melting points were uncorrected. Precoated silica gel plates F-254 were used for analytical thin-layer chromatography. Column chromatography was performed on silica gel (300-400 mesh). Starting materials were readily prepared according to literature procedures. Unless otherwise noted, all reagents were obtained commercially and used without further purification.

**Procedure of synthesis of starting materials 1<sup>[1]</sup>:**

1) To a stirred solution of acetylene (**A**; 10.2 mmol) in dry THF (30 mL) under argon was added *n*-BuLi (4.5 mL, 11.2 mmol, 2.5 M solution in hexane) via a syringe at 0 °C. The mixture was allowed to stir for 30 min at 0 °C. Then methyl formate (0.28 mL, 4.52 mmol) was added. The mixture was allowed to stir for an additional 30 min at 0 °C, and then for 2 h at room temperature. The mixture was poured into an aqueous saturated solution of  $\text{NH}_4\text{Cl}$ , and the product was extracted with ethyl acetate. The combined organic layers were washed with a saturated aqueous sodium chloride solution, dried over  $\text{MgSO}_4$ , and filtered, and the solvents were removed under reduced pressure. The residue was purified by flash column chromatography (silica gel, PE/EA = 10/1) to give **B**.

Procedure A:  $\text{MnO}_2$  (15 equiv.) was added to a solution of **B** (5 mmol) in  $\text{CH}_2\text{Cl}_2$  (15 mL) at room temperature. The resulting mixture was stirred overnight. Then the solid was filtered, and the solvents were removed under reduced pressure. The residue was purified by flash column chromatography (silica gel, PE/EA = 50/1) to give **2**.

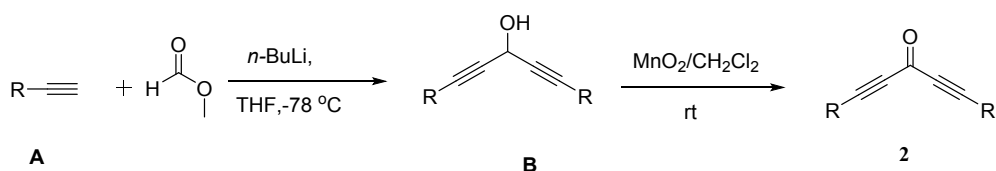

2) To a stirred solution of acetylene (**A**, 8 mmol) in dry THF (30 mL) under argon was added *n*-BuLi (3.36 mL, 8.4 mmol, 2.5 M solution in hexane) via a syringe at 0 °C. The mixture was allowed to stir for 30 min at 0 °C. Then 3-phenylpropionaldehyde (**C**, 8 mmol) was added. The mixture was allowed to stir for an additional 30 min at 0 °C, and then for 2 h at room temperature. It was then poured into aqueous saturated NH<sub>4</sub>Cl solution and extracted with ethyl acetate. The combined organic layers were washed with a saturated aqueous sodium chloride solution, dried over MgSO<sub>4</sub>, and filtered, and the solvents were removed under reduced pressure. The residue was purified by flash column chromatography (silica gel, PE/EA = 10/1) to give **D**.

**D** used the same procedure as general procedure A to give **2** (silica gel, PE/EA = 50/1).

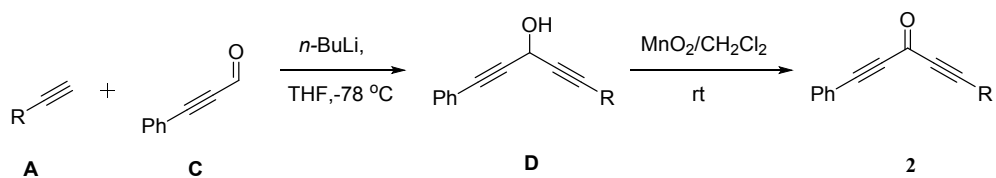

### Synthesis of 4-(quinolin-2-yl)phenol Derivatives **3a-3c**, **3e-3f**, **3i**, **3k-3z**.

The reaction mixture of **1** (1.5 mmol), **2** (0.5 mmol), were stirred at 100 °C for 6-10 h in a sealed tube, and monitored periodically by TLC. After the resulting solution cooled to room temperature, the target product **3** was purified and raw material **1** was recycled by column chromatography on silica gel using a mixture of ethyl acetate and petroleum ether.

### Synthesis of 4-(quinolin-2-yl)phenol Derivatives **3d**, **3g**, **3h**, and **3j**.

**1** (0.6 mmol) and **2** (0.5 mmol) were dissolved in PhCl (1 mL), and stirred at 100 °C for 10 h in a sealed tube. The reaction monitored periodically by TLC. After the resulting solution cooled to room temperature, the target product **3** was purified by column chromatography on silica gel using a mixture of ethyl acetate and petroleum ether.

## References

[1] Q.-H. Teng, Y.-L. Xu, Y. Liang, H.-S. Wang, Y.-C. Wang, Y.-M. Pan, *Adv. Synth. Catal.* **2016**, 358, 1897.

## Spectral data of all compounds

2'-(quinolin-2-yl)-[1,1':3',1''-terphenyl]-5'-ol (**3a**)

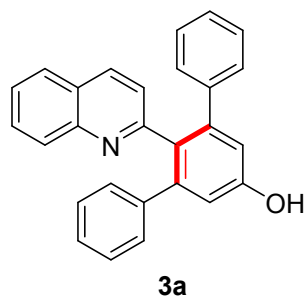

The reaction of 2-methylquinoline (**1a**) (214.8 mg, 1.5 mmol), and 1,5-diphenylpenta-1,4-diyne-3-one (**2a**) (115.1 mg, 0.5 mmol) at 100 °C for 10 h, isolated by column chromatography (silica gel, petroleum ether/AcOEt = 10/1), affords 158.7 mg (85%) of **3a** as light yellow solid. **m.p.** 205-207 °C.

**<sup>1</sup>H NMR** (400 MHz, DMSO-*d*<sub>6</sub>): δ 10.05 (s, 1H), 7.86 (d, *J* = 8.4 Hz, 1H), 7.73 (d, *J* = 8.0 Hz, 1H), 7.66 (d, *J* = 8.4 Hz, 1H), 7.55–7.53 (m, 1H), 7.42–7.40 (m, 1H), 7.05 (s, 10H), 6.97 (d, *J* = 8.4 Hz, 1H), 6.88 (s, 2H) ppm.

**<sup>13</sup>C NMR** (100 MHz, DMSO-*d*<sub>6</sub>): δ 159.8, 157.4, 147.4, 143.6, 141.9, 135.0, 130.7, 129.7, 129.2, 128.2, 128.1, 127.0, 126.7, 126.2, 125.7, 116.6.

**HRMS** (*m/z*) (ESI): calcd for C<sub>27</sub>H<sub>20</sub>NO 374.1539 [M+H<sup>+</sup>]; found 374.1535.

2'-(5-chloroquinolin-2-yl)-[1,1':3',1''-terphenyl]-5'-ol (**3b**)

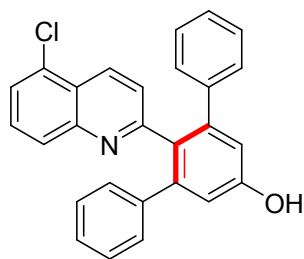

**3b**

The reaction of 5-chloro-2-methylquinoline (**1b**) (266.4 mg, 1.5 mmol), and 1,5-diphenylpenta-1,4-diyne-3-one (**2a**) (115.1 mg, 0.5 mmol) at 100 °C for 6 h, isolated by column chromatography (silica gel, petroleum ether/AcOEt = 10/1), affords 118.3 mg (58%) of **3b** as light yellow solid. **m.p.** 221-223 °C.

**<sup>1</sup>H NMR** (400 MHz, DMSO-*d*<sub>6</sub>): δ 10.01 (s, 1H), 8.09 (d, *J* = 8.7 Hz, 1H), 7.68–7.64 (m, 3H), 7.14 (d, *J* = 8.7 Hz, 1H), 7.11–7.02 (m, 10H), 6.87 (s, 2H) ppm.

**<sup>13</sup>C NMR** (100 MHz, DMSO-*d*<sub>6</sub>): δ 160.8, 157.6, 148.0, 143.5, 141.6, 131.0, 130.3, 129.9, 129.8, 129.6, 128.8, 128.2, 127.0, 126.9, 126.8, 123.8, 116.5 ppm.

**HRMS** (*m/z*) (ESI): calcd for C<sub>27</sub>H<sub>18</sub>ClNO 408.1150 [M+H<sup>+</sup>]; found 408.1146.

2'-(6-fluoroquinolin-2-yl)-[1,1':3',1''-terphenyl]-5'-ol (**3c**)

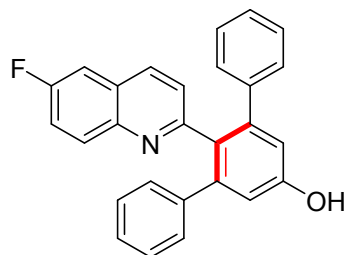

**3c**

The reaction of 6-fluoro-2-methylquinoline (**1c**) (241.8 mg, 1.5 mmol), and 1,5-diphenylpenta-1,4-diyne-3-one (**2a**) (115.1 mg, 0.5 mmol) at 100 °C for 6 h, isolated by column chromatography (silica gel, petroleum ether/AcOEt = 10/1), affords 107.7 mg (55%) of **3c** as light yellow solid. **m.p.** 238-240 °C.

**<sup>1</sup>H NMR** (400 MHz, DMSO-*d*<sub>6</sub>): δ 9.97 (s, 1H), 7.88 (d, *J* = 8.5 Hz, 1H), 7.69–7.66 (m, 1H), 7.54–7.50 (m, 1H), 7.46–7.44 (m, 1H), 7.09–7.03 (m, 10H), 7.03–6.99 (m, 1H), 6.88 (s, 2H) ppm.

**<sup>13</sup>C NMR** (100 MHz, DMSO-*d*<sub>6</sub>): δ 161.2, 159.2, 158.7, 157.4, 144.5, 143.5, 141.7, 134.4, 131.8, 130.2, 129.6, 128.1, 126.9, 126.7, 126.3, 119.5, 116.5, 111.1 ppm.

**HRMS** (*m/z*) (ESI): calcd for C<sub>27</sub>H<sub>19</sub>FNO 392.1445 [M+H<sup>+</sup>]; found 392.1440.

2'-(6-bromoquinolin-2-yl)-[1,1':3',1''-terphenyl]-5'-ol (**3d**)

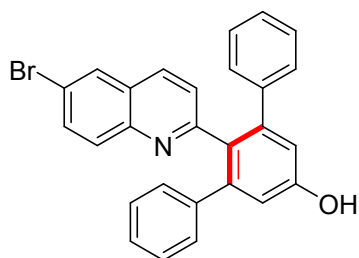

**3d**

The reaction of 6-bromo-2-methylquinoline (**1d**) (133.3 mg, 0.6 mmol), and 1,5-diphenylpenta-1,4-diyne-3-one (**2a**) (115.1 mg, 0.5 mmol) in PhCl (1 mL) at 100 °C for 10 h, isolated by column chromatography (silica gel, petroleum ether/AcOEt = 10/1), affords 174.2 mg (77%) of **3d** as light yellow solid. **m.p.** 239-241 °C.

**<sup>1</sup>H NMR** (400 MHz, DMSO-*d*<sub>6</sub>): δ 9.97 (s, 1H), 8.04 (d, *J* = 2.2 Hz, 1H), 7.87 (d, *J* = 8.5 Hz, 1H), 7.67–7.62 (m, 1H), 7.56 (d, *J* = 9.0 Hz, 1H), 7.07–7.00 (m, 11H), 6.86 (s, 2H) ppm.

**<sup>13</sup>C NMR** (100 MHz, DMSO-*d*<sub>6</sub>): δ 160.4, 157.5, 145.9, 143.4, 141.6, 134.1, 132.6, 131.3, 130.2, 130.0, 129.6, 128.1, 127.4, 126.9, 126.5, 119.5, 116.5 ppm.

**HRMS** (*m/z*) (ESI): calcd for C<sub>27</sub>H<sub>19</sub>BrNO 452.0645, 454.0624 [M+H<sup>+</sup>]; found 452.0643, 454.0621.

2'-(7-chloroquinolin-2-yl)-[1,1':3',1''-terphenyl]-5'-ol (**3e**)

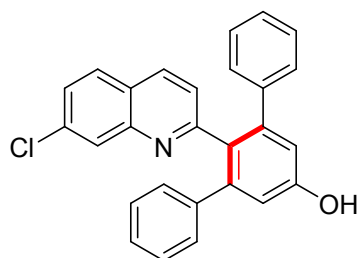

**3e**

The reaction of 7-chloro-2-methylquinoline (**1e**) (266.4 mg, 1.5 mmol), and 1,5-diphenylpenta-1,4-diyne-3-one (**2a**) (115.1 mg, 0.5 mmol) at 100 °C for 7 h, isolated by column chromatography (silica gel, petroleum ether/AcOEt = 10/1), affords 122.4 mg (60%) of **3e** as light yellow solid. **m.p.** 125-127 °C.

**<sup>1</sup>H NMR** (400 MHz, DMSO-*d*<sub>6</sub>): δ 9.96 (s, 1H), 7.94 (d, *J* = 8.4 Hz, 1H), 7.92 (d, *J* = 8.5 Hz, 1H), 7.81 (d, *J* = 8.7 Hz, 1H), 7.66 (d, *J* = 2.1 Hz, 1H), 7.48–7.44 (m, 1H), 7.10–7.02 (m, 9H), 7.01 (d, *J* = 8.5 Hz, 1H), 6.85 (s, 2H) ppm.

**<sup>13</sup>C NMR** (100 MHz, DMSO-*d*<sub>6</sub>): δ 161.1, 157.5, 147.6, 143.4, 141.6, 134.9, 134.1, 130.1, 130.1, 129.6, 128.1, 127.6, 127.2, 126.9, 126.1, 124.7, 116.5 ppm.

**HRMS** (*m/z*) (ESI): calcd for C<sub>27</sub>H<sub>18</sub>ClNO 408.1150 [M+H<sup>+</sup>]; found 408.1145.

2'-(6-ethoxyquinolin-2-yl)-[1,1':3',1''-terphenyl]-5'-ol (**3f**)

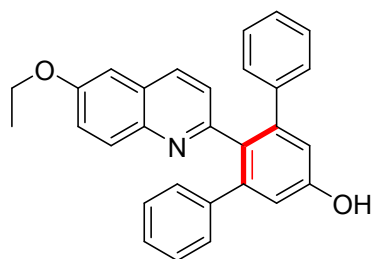

**3f**

The reaction of 6-ethoxy-2-methylquinolin (**1f**) (280.86 mg, 1.5 mmol), and 1,5-diphenylpenta-1,4-diyne-3-one (**2a**) (115.1 mg, 0.5 mmol) at 100 °C for 6 h, isolated by column chromatography (silica gel, petroleum ether/AcOEt = 10/1), affords 121.1 mg (58%) of **3f** as light yellow solid. **m.p.** 155-157 °C.

**<sup>1</sup>H NMR** (400 MHz, DMSO-*d*<sub>6</sub>): δ 9.90 (s, 1H), 7.75 (d, *J* = 8.5 Hz, 1H), 7.56 (d, *J* = 9.2 Hz, 1H), 7.20–7.12 (m, 1H), 7.11 (d, *J* = 2.7 Hz, 1H), 7.07 (d, *J* = 5.9 Hz, 10H), 6.91 (d, *J* = 8.4 Hz, 1H), 6.88 (s, 2H), 4.06 (q, *J* = 6.8 Hz, 2H), 1.34 (t, *J* = 6.8 Hz, 3H) ppm.

**<sup>13</sup>C NMR** (100 MHz, DMSO-*d*<sub>6</sub>): δ 157.2, 156.9, 156.7, 143.3, 143.2, 141.9, 133.7, 130.6, 130.5, 129.6, 128.0, 127.1, 126.7, 125.7, 122.0, 116.4, 106.4, 63.8, 15.0 ppm.

**HRMS** (*m/z*) (ESI): calcd for C<sub>29</sub>H<sub>24</sub>NO<sub>2</sub> 418.1802 [M+H<sup>+</sup>]; found 418.1803.

2'-(6,7-dichloroquinolin-2-yl)-[1,1':3',1''-terphenyl]-5'-ol (**3g**)

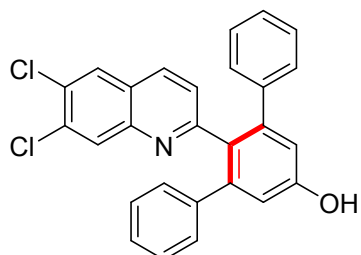

**3g**

The reaction of 6,7-dichloro-2-methylquinoline (**1g**) (127.2 mg, 0.6 mmol), and 1,5-diphenylpenta-1,4-diyne-3-one (**2a**) (115.1 mg, 0.5 mmol) in PhCl (1 mL) at 100 °C for 10 h, isolated by column chromatography (silica gel, petroleum ether/AcOEt = 10/1), affords 161.4 mg (73%) of **3g** as light yellow solid. **m.p.** 186-187 °C.

**<sup>1</sup>H NMR** (400 MHz, DMSO-*d*<sub>6</sub>): δ 10.02 (s, 1H), 8.15 (s, 1H), 7.92 (d, *J* = 8.5 Hz, 1H), 7.88 (s, 1H), 7.11–7.05 (m, 7H), 7.03–6.97 (m, 4H), 6.85 (s, 2H) ppm.

**<sup>13</sup>C NMR** (100 MHz, DMSO-*d*<sub>6</sub>): δ 161.7, 157.6, 146.0, 143.4, 141.5, 134.2, 132.3, 130.0, 129.8, 129.6, 129.3, 129.2, 128.2, 127.0, 125.6, 116.5 ppm.

**HRMS** (*m/z*) (ESI): calcd for C<sub>27</sub>H<sub>18</sub>Cl<sub>2</sub>NO 442.0760 [M+H<sup>+</sup>]; found 442.0775.

2'-(6-bromoquinolin-2-yl)-4,4''-dimethyl-[1,1':3',1''-terphenyl]-5'-ol (**3h**)

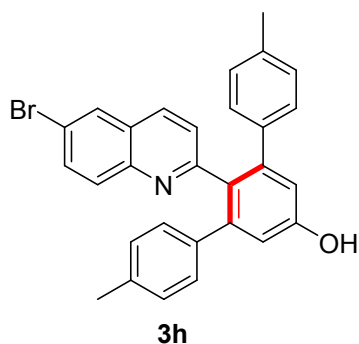

The reaction of 6-bromo-2-methylquinoline (**1d**) (133.3 mg, 0.6 mmol), and 1,5-di-p-tolylpenta-1,4-diyne-3-one (**2b**) (129.1 mg, 0.5 mmol) in PhCl (1 mL) at 100 °C for 10 h, isolated by column chromatography (silica gel, petroleum ether/AcOEt = 10/1), affords 167.7 mg (70%) of **3h** as light yellow solid. **m.p.** 136-139 °C.

**<sup>1</sup>H NMR** (400 MHz, DMSO-*d*<sub>6</sub>): δ 9.88 (s, 1H), 8.05 (d, *J* = 2.1 Hz, 1H), 7.89 (d, *J* = 8.5 Hz, 1H), 7.69–7.62 (m, 1H), 7.61 (d, *J* = 9.0 Hz, 1H), 7.03 (d, *J* = 8.5 Hz, 1H), 6.89–6.83 (m, 8H), 6.80 (s, 2H), 2.11 (s, 6H) ppm.

**<sup>13</sup>C NMR** (100 MHz, DMSO-*d*<sub>6</sub>): δ 160.8, 157.4, 145.8, 143.2, 138.7, 135.9, 134.1, 132.6, 131.4, 130.1, 130.0, 129.5, 128.7, 127.5, 126.6, 119.4, 116.3, 21.0 ppm.

**HRMS** (*m/z*) (ESI): calcd for C<sub>29</sub>H<sub>23</sub>BrNO 480.0958 482.0937 [M+H<sup>+</sup>]; found 480.0959 482.0934.

2'-(7-fluoroquinolin-2-yl)-3,3"-dimethyl-[1,1':3',1"-terphenyl]-5'-ol (**3i**)

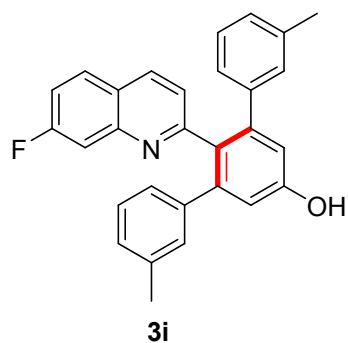

The reaction of 7-Fluoro-2-methylpyridine (**1h**) (241.8 mg, 1.5 mmol), and 1,5-di-m-tolylpenta-1,4-diyne-3-one (**2c**) (129.1 mg, 0.5 mmol) at 100 °C for 7 h, isolated by column chromatography (silica gel, petroleum ether/AcOEt = 10/1), affords 130.0 mg (62%) of **3i** as light yellow solid. **m.p.** 171-173 °C.

**<sup>1</sup>H NMR** (400 MHz, DMSO-*d*<sub>6</sub>): δ 9.88 (s, 1H), 7.94 (d, *J* = 8.5 Hz, 1H), 7.86–7.80 (m, 1H), 7.40–7.32 (m, 3H), 6.97–6.93 (m, 3H), 6.91–6.86 (m, 2H), 6.88–6.82 (m, 3H), 6.78 (d, *J* = 7.5 Hz, 2H), 2.06 (s, 6H) ppm.

**<sup>13</sup>C NMR** (100 MHz, DMSO-*d*<sub>6</sub>): δ 163.8, 161.4, 161.2, 157.4, 148.0, 143.3, 141.5, 137.1, 134.9, 130.6, 130.5, 130.2, 127.8, 127.5, 126.8, 125.1, 123.3, 116.7, 116.3, 112.4, 21.3 ppm.

**HRMS** (*m/z*) (ESI): calcd for C<sub>29</sub>H<sub>23</sub>FNO 420.1758 [M+H<sup>+</sup>]; found 420.1748.



2'-(benzo[f]quinolin-3-yl)-[1,1':3',1''-terphenyl]-5'-ol (**3j**)

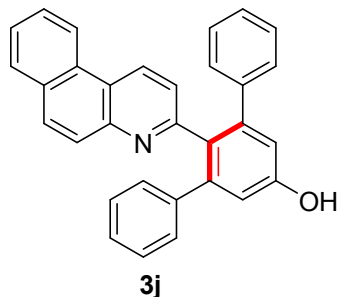

The reaction of 3-methylbenzo[f]quinoline (**1i**) (116.0 mg, 0.6 mmol), and 1,5-diphenylpenta-1,4-diyne-3-one (**2a**) (115.1 mg, 0.5 mmol) in PhCl (1 mL) at 100 °C for 10 h, isolated by column chromatography (silica gel, petroleum ether/AcOEt = 10/1), affords 173.6 mg (82%) of **3j** as light yellow solid. **m.p.** 153-155 °C.

**<sup>1</sup>H NMR** (400 MHz, DMSO-*d*<sub>6</sub>): δ 9.93 (s, 1H), 8.78 (d, *J* = 8.6 Hz, 1H), 8.65 (d, *J* = 7.8 Hz, 1H), 7.97–7.90 (m, 2H), 7.67–7.61 (m, 2H), 7.57 (d, *J* = 9.1 Hz, 1H), 7.14 (d, *J* = 8.5 Hz, 1H), 7.10–7.01 (m, 10H), 6.89 (s, 2H) ppm.

**<sup>13</sup>C NMR** (100 MHz, DMSO-*d*<sub>6</sub>): δ 159.2, 157.3, 146.9, 143.5, 141.8, 131.5, 130.6, 130.3, 130.3, 129.6, 129.0, 128.3, 128.0, 127.6, 127.6, 126.8, 125.8, 123.5, 122.8, 116.5 ppm.

**HRMS** (*m/z*) (ESI): calcd for C<sub>31</sub>H<sub>22</sub>NO 424.1696 [M+H<sup>+</sup>]; found 424.1690.

2'-(6-methylpyridin-2-yl)-[1,1':3',1''-terphenyl]-5'-ol (**3k**)

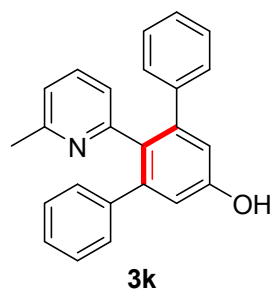

The reaction of 2,6-dimethylpyridin (**1j**) (160.7 mg, 1.5 mmol), and 1,5-diphenylpenta-1,4-diyne-3-one (**2a**) (115.1 mg, 0.5 mmol) at 100 °C for 9 h, isolated by column chromatography (silica gel, petroleum ether/AcOEt = 10/1), affords 114.7 mg (68%) of **3k** as light yellow solid. **m.p.** 153-155 °C.

**<sup>1</sup>H NMR** (400 MHz, DMSO-*d*<sub>6</sub>) δ 9.91 (s, 1H), 7.20 (d, *J* = 7.7 Hz, 1H), 7.16–7.11 (m, 6H), 7.04–7.00 (m, 4H), 6.79 (d, *J* = 5.9 Hz, 3H), 6.56 (d, *J* = 7.6 Hz, 1H), 2.13 (s, 3H) ppm.

**<sup>13</sup>C NMR** (100 MHz, DMSO-*d*<sub>6</sub>): δ 158.1, 157.1, 156.5, 143.2, 142.0, 135.6, 130.5, 129.6, 127.9, 126.7, 124.2, 120.3, 116.3, 24.3 ppm.

**HRMS** (*m/z*) (ESI): calcd for C<sub>24</sub>H<sub>19</sub>NO 338.1539 [M+H<sup>+</sup>]; found 338.1540.

2,2''-dichloro-2'-(quinolin-2-yl)-[1,1':3',1''-terphenyl]-5'-ol (**3l**)

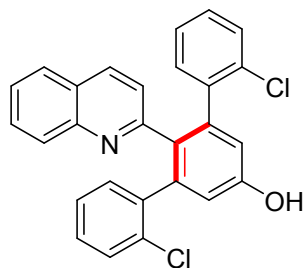

**3l**

The reaction of 2-methylquinoline (**1a**) (214.8 mg, 1.5 mmol), and 1,5-bis(2-chlorophenyl)penta-1,4-diyne-3-one (**2d**) (149.6 mg, 0.5 mmol) at 100 °C for 8 h, isolated by column chromatography (silica gel, petroleum ether/AcOEt = 10/1), affords 181.4 mg (82%) of **3l** as light yellow solid. **m.p.** 235-237 °C.

**<sup>1</sup>H NMR** (400 MHz, DMSO-*d*<sub>6</sub>): δ 10.10 (s, 1H), 7.86 (d, *J* = 8.5 Hz, 1H), 7.70 (d, *J* = 8.1 Hz, 1H), 7.55–7.49 (m, 2H), 7.40–7.32 (m, 1H), 7.17–7.10 (m, 4H), 6.98–6.91 (m, 7H) ppm.

**<sup>13</sup>C NMR** (100 MHz, DMSO-*d*<sub>6</sub>): δ 160.5, 158.4, 158.1, 157.2, 147.2, 137.3, 134.7, 132.3, 132.0, 129.7, 129.6, 129.5, 129.2, 129.1, 129.0, 127.9, 126.5, 126.0, 124.3, 124.1, 117.7, 115.6, 115.4 ppm.

**HRMS** (*m/z*) (ESI): calcd for C<sub>27</sub>H<sub>18</sub>Cl<sub>2</sub>NO 442.0760 [M+H<sup>+</sup>]; found 442.0765.

3,3''-dimethyl-2'-(quinolin-2-yl)-[1,1':3',1''-terphenyl]-5'-ol (**3m**)

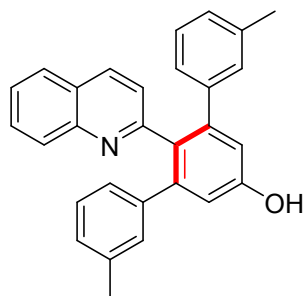

**3m**

The reaction of 2-methylquinoline (**1a**) (214.8 mg, 1.5 mmol), and 1,5-di-*m*-tolylpenta-1,4-diyne-3-one (**2c**) (129.1 mg, 0.5 mmol) at 100 °C for 9 h, isolated by column chromatography (silica gel, petroleum ether/AcOEt = 10/1), affords 150.6 mg (75%) of **3m** as light yellow solid. **m.p.** 187-189 °C.

**<sup>1</sup>H NMR** (500 MHz, DMSO-*d*<sub>6</sub>): δ 9.90 (s, 1H), 7.89 (d, *J* = 8.5 Hz, 1H), 7.73–7.68 (m, 2H), 7.59–7.54 (m, 1H), 7.44–7.39 (m, 1H), 6.97 (d, *J* = 8.2 Hz, 3H), 6.92–6.73 (m, 8H), 2.04 (s, 6H) ppm.

**<sup>13</sup>C NMR** (125 MHz, DMSO-*d*<sub>6</sub>): δ 159.9, 157.3, 147.2, 143.4, 141.6, 137.0, 134.8, 130.5, 130.5, 129.6, 129.1, 128.0, 127.8, 127.5, 126.8, 126.5, 126.1, 125.6, 116.3, 21.3 ppm.

**HRMS** (*m/z*) (ESI): calcd for C<sub>29</sub>H<sub>24</sub>NO 402.1852 [M+H<sup>+</sup>]; found 402.1849.

3,3''-dimethoxy-2'-(quinolin-2-yl)-[1,1':3',1''-terphenyl]-5'-ol (**3n**)

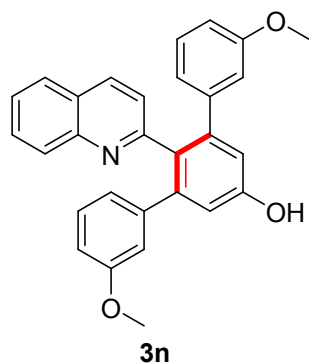

The reaction of 2-methylquinoline (**1a**) (214.8 mg, 1.5 mmol), and 1,5-bis(3-methoxyphenyl)penta-1,4-diyne-3-one (**2e**) (145.2 mg, 0.5 mmol) at 100 °C for 10 h, isolated by column chromatography (silica gel, petroleum ether/AcOEt = 10/1), affords 140.8 mg (65%) of **3n** as light yellow solid. **m.p.** 103-104 °C.

**<sup>1</sup>H NMR** (400 MHz, DMSO-*d*<sub>6</sub>): δ 9.99 (s, 1H), 7.92 (d, *J* = 8.5 Hz, 1H), 7.75 (d, *J* = 8.5 Hz, 2H), 7.59–7.52 (m, 1H), 7.45–7.40 (m, 1H), 7.05 (d, *J* = 8.4 Hz, 1H), 7.00–6.92 (m, 2H), 6.93 (s, 2H), 6.71 (d, *J* = 7.6 Hz, 2H), 6.61–6.56 (m, 4H), 3.38 (s, 6H) ppm.

**<sup>13</sup>C NMR** (100 MHz, DMSO-*d*<sub>6</sub>): δ 160.0, 158.8, 157.4, 147.3, 143.2, 143.1, 135.1, 130.6, 129.7, 129.2, 129.1, 128.0, 126.6, 126.2, 125.5, 122.1, 116.5, 115.1, 113.1, 55.0 ppm.

**HRMS** (*m/z*) (ESI): calcd for C<sub>29</sub>H<sub>24</sub>NO<sub>3</sub> 434.1751 [M+H<sup>+</sup>]; found 434.1751.

4,4''-dimethyl-2'-(quinolin-2-yl)-[1,1':3',1''-terphenyl]-5'-ol (**3o**)

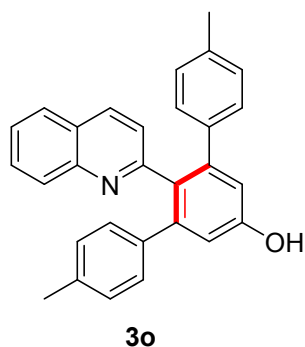

The reaction of 2-methylquinoline (**1a**) (214.8 mg, 1.5 mmol), and 1,5-di-*p*-tolylpenta-1,4-diyne-3-one (**2b**) (129.1 mg, 0.5 mmol) at 100 °C for 9 h, isolated by column chromatography (silica gel, petroleum ether/AcOEt = 10/1), affords 146.6 mg (73%) of **3o** as light yellow solid. **m.p.** 178-180 °C.

**<sup>1</sup>H NMR** (400 MHz, DMSO-*d*<sub>6</sub>): δ 9.80 (s, 1H), 7.76 (d, *J* = 8.4 Hz, 1H), 7.61–7.56 (m, 2H), 7.50–7.43 (m, 1H), 7.36–7.25 (m, 1H), 6.89–6.72 (m, 5H), 6.81–6.68 (m, 6H), 1.96 (s, 6H) ppm.

**<sup>13</sup>C NMR** (100 MHz, DMSO-*d*<sub>6</sub>): δ 160.0, 157.3, 147.3, 143.3, 138.9, 135.8, 134.9, 130.5, 129.5, 129.2, 128.7, 128.0, 126.4, 126.2, 125.6, 116.4, 20.9 ppm.

**HRMS** (*m/z*) (ESI): calcd for C<sub>29</sub>H<sub>24</sub>NO 402.1852 [M+H<sup>+</sup>]; found 402.1856.

4,4''-diethyl-2'-(quinolin-2-yl)-[1,1':3',1''-terphenyl]-5'-ol (**3p**)

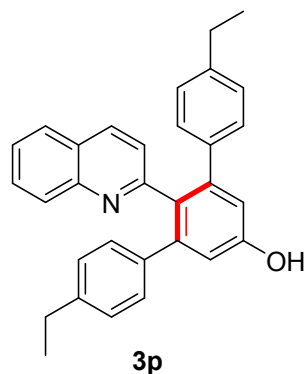

The reaction of 2-methylquinoline (**1a**) (214.8 mg, 1.5 mmol), and 1,5-bis(4-ethylphenyl)penta-1,4-dien-3-one (**2f**) (143.2 mg, 0.5 mmol) at 100 °C for 9 h, isolated by column chromatography (silica gel, petroleum ether/AcOEt = 10/1), affords 150.3 mg (70%) of **3p** as light yellow solid. **m.p.** 176-178 °C.

**<sup>1</sup>H NMR** (400 MHz, DMSO-*d*<sub>6</sub>): δ 9.87 (s, 1H), 7.87 (d, *J* = 8.5 Hz, 1H), 7.71–7.60 (m, 2H), 7.55–7.48 (m, 1H), 7.42–7.38 (m, 1H), 6.98–6.81 (m, 5H), 6.89–6.74 (m, 6H), 2.40 (q, *J* = 8.5 Hz, 4H), 1.01 (t, *J* = 8.4 Hz, 6H) ppm.

**<sup>13</sup>C NMR** (100 MHz, DMSO-*d*<sub>6</sub>): δ 159.9, 157.3, 147.3, 143.3, 142.1, 139.2, 134.8, 130.5, 129.5, 129.4, 129.2, 128.0, 127.4, 126.4, 126.1, 125.6, 116.4, 28.0, 15.6 ppm.

**HRMS** (*m/z*) (ESI): calcd for C<sub>31</sub>H<sub>28</sub>NO 430.2165 [M+H<sup>+</sup>]; found 430.2162.

4,4''-difluoro-2'-(quinolin-2-yl)-[1,1':3',1''-terphenyl]-5'-ol (**3q**)

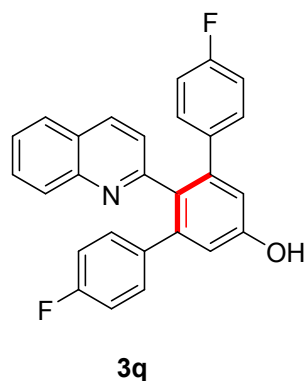

The reaction of 2-methylquinoline (**1a**) (214.8 mg, 1.5 mmol), and 1,5-bis(4-fluorophenyl)penta-1,4-dien-3-one (**2g**) (133.2 mg, 0.5 mmol) at 100 °C for 7 h, isolated by column chromatography (silica gel, petroleum ether/AcOEt = 10/1), affords 161.7 mg (79%) of **3q** as light yellow solid. **m.p.** 226-228 °C.

**<sup>1</sup>H NMR** (400 MHz, DMSO-*d*<sub>6</sub>): δ 10.13 (s, 1H), 7.91 (d, *J* = 8.5 Hz, 1H), 7.75 (d, *J* = 7.7 Hz, 1H), 7.67 (d, *J* = 8.4 Hz, 1H), 7.60–7.55 (m, 1H), 7.46–7.41 (m, 1H), 7.07 (m, 4H), 6.96 (d, *J* = 8.5 Hz, 1H), 6.86–6.69 (m, 6H) ppm.

$^{13}\text{C}$  NMR (100 MHz,  $\text{DMSO-}d_6$ ):  $\delta$  162.7, 160.3, 159.6, 157.6, 147.5, 142.6, 138.2, 135.4, 131.7, 131.7, 130.8, 130.0, 129.2, 128.3, 126.9, 126.3, 125.7, 116.8, 115.2, 115.0 ppm.

HRMS ( $m/z$ ) (ESI): calcd for  $\text{C}_{27}\text{H}_{18}\text{F}_2\text{NO}$  410.1351 [ $\text{M}+\text{H}^+$ ]; found 410.1349.

4-fluoro-2'-(quinolin-2-yl)-[1,1':3',1''-terphenyl]-5'-ol (**3r**)

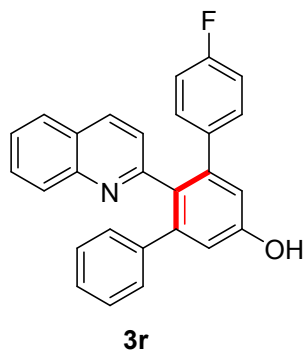

The reaction of 2-methylquinoline (**1a**) (214.8 mg, 1.5 mmol), and 1-(4-fluorophenyl)-5-phenylpenta-1,4-dien-3-one (**2h**) (124.1 mg, 0.5 mmol) at 100 °C for 8 h, isolated by column chromatography (silica gel, petroleum ether/AcOEt = 10/1), affords 148.8 mg (76%) of **3r** as light yellow solid. **m.p.** 189-191 °C.

$^1\text{H}$  NMR (400 MHz,  $\text{DMSO-}d_6$ ):  $\delta$  10.03 (s, 1H), 7.90 (d,  $J = 8.5$  Hz, 1H), 7.74 (d,  $J = 8.0$  Hz, 1H), 7.68 (d,  $J = 8.4$  Hz, 1H), 7.59–7.54 (m, 1H), 7.45–7.41 (m, 1H), 7.07–6.86 (m, 7H), 6.99 (d,  $J = 8.4$  Hz, 1H), 6.93–6.84 (m, 4H) ppm.

$^{13}\text{C}$  NMR (100 MHz,  $\text{DMSO-}d_6$ ):  $\delta$  162.5, 160.1, 159.6, 157.4, 147.4, 143.5, 142.5, 141.7, 138.2, 135.0, 131.5, 130.6, 129.6, 129.1, 128.1, 128.1, 126.9, 126.6, 126.1, 125.6, 116.6, 115.0, 114.8 ppm.

HRMS ( $m/z$ ) (ESI): calcd for  $\text{C}_{27}\text{H}_{19}\text{FNO}$  392.1445 [ $\text{M}+\text{H}^+$ ]; found 392.1442.

4-chloro-2'-(quinolin-2-yl)-[1,1':3',1''-terphenyl]-5'-ol (**3s**)

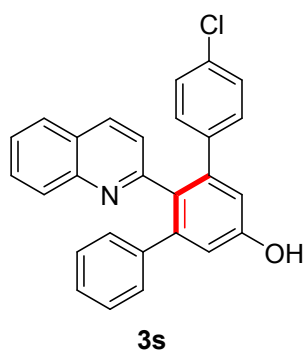

The reaction of 2-methylquinoline (**1a**) (214.8 mg, 1.5 mmol), and 1-(4-chlorophenyl)-5-phenylpenta-1,4-diyne-3-one (**2i**) (132.4 mg, 0.5 mmol) at 100 °C for 8 h, isolated by column chromatography (silica gel, petroleum ether/AcOEt = 10/1), affords 150.9 mg (74%) of **3s** as light yellow solid. **m.p.** 232-235 °C.

**<sup>1</sup>H NMR** (400 MHz, DMSO-*d*<sub>6</sub>): δ 9.99 (s, 1H), 7.92 (d, *J* = 8.5 Hz, 1H), 7.76 (d, *J* = 7.9 Hz, 1H), 7.67 (d, *J* = 8.3 Hz, 1H), 7.60–7.56 (m, 1H), 7.45–7.39 (m, 1H), 7.12 (d, *J* = 8.5 Hz, 2H), 7.07 (d, *J* = 8.2 Hz, 7H), 6.99 (d, *J* = 8.4 Hz, 1H), 6.87 (s, 2H) ppm.

**<sup>13</sup>C NMR** (100 MHz, DMSO-*d*<sub>6</sub>): δ 159.3, 157.4, 147.3, 143.5, 142.1, 141.6, 140.7, 135.0, 131.7, 131.3, 130.4, 129.6, 129.6, 129.1, 128.1, 128.0, 126.9, 126.6, 126.1, 125.5, 116.8, 116.4 ppm.

**HRMS** (*m/z*) (ESI): calcd for C<sub>27</sub>H<sub>19</sub>ClNO 408.1150 [M+H<sup>+</sup>]; found 408.1147.

3,5-dimethyl-2'-(quinolin-2-yl)-[1,1':3',1''-terphenyl]-5'-ol (**3t**)

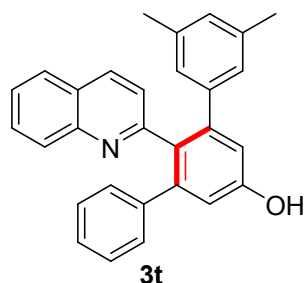

The reaction of 2-methylquinoline (**1a**) (214.8 mg, 1.5 mmol), and 1-(3,5-dimethylphenyl)-5-phenylpenta-1,4-diyne-3-one (**2j**) (129.2 mg, 0.5 mmol) at 100 °C for 9 h, isolated by column chromatography (silica gel, petroleum ether/AcOEt = 10/1), affords 136.5 mg (68%) of **3t** as light yellow solid. **m.p.** 132-134 °C.

**<sup>1</sup>H NMR** (400 MHz, DMSO-*d*<sub>6</sub>): δ 9.90 (s, 1H), 7.87 (d, *J* = 8.5 Hz, 1H), 7.76–7.69 (m, 2H), 7.57–7.52 (m, 1H), 7.45–7.41 (m, 1H), 7.11–7.01 (m, 5H), 6.97 (d, *J* = 8.4 Hz, 1H), 6.88–6.82 (m, 2H), 6.70 (s, 2H), 6.64 (s, 1H), 1.95 (s, 6H) ppm.

**<sup>13</sup>C NMR** (100 MHz, DMSO-*d*<sub>6</sub>): δ 159.9, 157.2, 147.2, 143.5, 143.2, 141.8, 141.4, 136.7, 134.7, 130.5, 129.6, 129.5, 129.1, 128.2, 128.0, 127.9, 127.7, 126.8, 126.4, 126.1, 125.5, 116.3, 116.2, 21.1 ppm.

**HRMS** (*m/z*) (ESI): calcd for C<sub>29</sub>H<sub>23</sub>NO 402.1852 [M+H<sup>+</sup>]; found 402.1848.

5-propyl-6-(quinolin-2-yl)-[1,1'-biphenyl]-3-ol (**3u**)

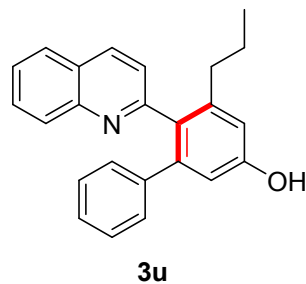

The reaction of 2-methylquinoline (**1a**) (214.8 mg, 1.5 mmol), and 1-phenylocta-1,4-diyne-3-one (**2k**) (98.2 mg, 0.5 mmol) at 100 °C for 10 h, isolated by column chromatography (silica gel, petroleum ether/AcOEt = 10/1), affords 118.8 mg (70%) of **3u** as light yellow solid. **m.p.** 90-93 °C.

**<sup>1</sup>H NMR** (400 MHz, DMSO-*d*<sub>6</sub>): δ 9.68 (s, 1H), 7.98 (m, 2H), 7.84 (d, *J* = 8.1 Hz, 1H), 7.70 (m, 1H), 7.55–7.51 (m, 1H), 7.07–7.01 (m, 5H), 6.96 (d, *J* = 8.4 Hz, 1H), 6.79 (d, *J* = 2.3 Hz, 1H), 6.69 (d, *J* = 2.1 Hz, 1H), 2.38 (t, *J* = 7.2 Hz, 2H), 1.36–1.30 (m, 2H), 0.63 (t, *J* = 7.6 Hz, 3H) ppm.

**<sup>13</sup>C NMR** (100 MHz, DMSO-*d*<sub>6</sub>): δ 160.2, 157.3, 147.5, 143.0, 142.5, 141.9, 135.4, 131.0, 129.8, 129.6, 129.3, 128.2, 128.1, 126.9, 126.7, 126.4, 125.1, 115.8, 114.8, 35.7, 24.2, 14.4 ppm.

**HRMS** (*m/z*) (ESI): calcd for C<sub>24</sub>H<sub>22</sub>NO 340.1696 [M+H<sup>+</sup>]; found 340.1694.

4-(quinolin-2-yl)-3,5-di(thiophen-2-yl)phenol (**3v**)

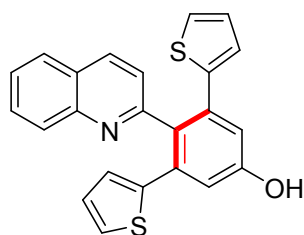

**3v**

The reaction of 2-methylquinoline (**1a**) (214.8 mg, 1.5 mmol), and 1,5-di(thiophen-2-yl)penta-1,4-diyne-3-one (**2l**) (121.2 mg, 0.5 mmol) at 100 °C for 6 h, isolated by column chromatography (silica gel, petroleum ether/AcOEt = 10/1), affords 171.5 mg (89%) of **3v** as light yellow solid. **m.p.** 184-186 °C.

**<sup>1</sup>H NMR** (400 MHz, DMSO-*d*<sub>6</sub>): δ 10.07 (s, 1H), 8.12 (d, *J* = 8.4 Hz, 1H), 7.95–7.89 (m, 2H), 7.72–7.65 (m, 1H), 7.57–7.51 (m, 1H), 7.26–7.15 (m, 2H), 7.18 (d, *J* = 8.4 Hz, 1H), 7.05 (s, 2H), 6.75–6.68 (m, 2H), 6.68–6.61 (m, 2H) ppm.

**<sup>13</sup>C NMR** (100 MHz, DMSO-*d*<sub>6</sub>): δ 159.3, 157.4, 147.5, 142.5, 136.2, 135.8, 130.2, 130.0, 129.5, 128.4, 127.5, 127.4, 127.2, 127.1, 125.2, 116.6 ppm.

**HRMS** (*m/z*) (ESI): calcd for C<sub>23</sub>H<sub>16</sub>NOS<sub>2</sub> 386.0673 [M+H<sup>+</sup>]; found 386.0657.

3,5-dicyclopropyl-4-(quinolin-2-yl)phenol (**3w**)

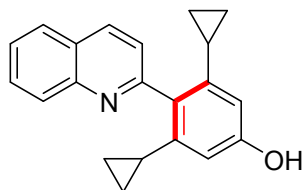

**3w**

The reaction of 2-methylquinoline (**1a**) (214.8 mg, 1.5 mmol), and 1,5-dicyclopropylpenta-1,4-diyne-3-one (**2m**) (79.1 mg, 0.5 mmol) at 100 °C for 10 h, isolated by column chromatography (silica gel, petroleum ether/AcOEt = 10/1), affords 85.9 mg (57%) of **3w** as White solid. **m.p.** 171-173 °C.

**<sup>1</sup>H NMR** (400 MHz, DMSO-*d*<sub>6</sub>): δ 9.34 (s, 1H), 8.37 (d, *J* = 8.4 Hz, 1H), 8.00–7.91 (m, 2H), 7.74–7.67 (m, 1H), 7.59–7.53 (m, 1H), 7.49 (d, *J* = 8.4 Hz, 1H), 6.19 (s, 2H), 1.41–1.33 (m, 2H), 0.49 (d, *J* = 54.5 Hz, 8H) ppm.

**<sup>13</sup>C NMR** (100 MHz, DMSO-*d*<sub>6</sub>) δ 160.8, 158.0, 148.2, 142.6, 136.2, 133.8, 130.0, 129.4, 128.4, 126.9, 126.8, 125.0, 108.3, 13.9, 9.9, 8.6 ppm.

**HRMS** (*m/z*) (ESI): calcd for C<sub>21</sub>H<sub>19</sub>NO 302.1539 [M+H<sup>+</sup>]; found 302.1531.

6-(quinolin-2-yl)-5-(thiophen-2-yl)-[1,1'-biphenyl]-3-ol (**3x**)

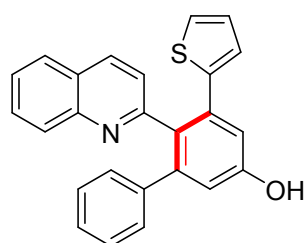

**3x**

The reaction of 2-methylquinoline (**1a**) (214.8 mg, 1.5 mmol), and 1-phenyl-5-(thiophen-2-yl)penta-1,4-diyne-3-one (**2n**) (118.2 mg, 0.5 mmol) at 100 °C for 7 h, isolated by column chromatography (silica gel, petroleum ether/AcOEt = 10/1), affords 165.1 mg (87%) of **3x** as light yellow solid. **m.p.** 207-208 °C.

**<sup>1</sup>H NMR** (400 MHz, DMSO-*d*<sub>6</sub>): δ 10.04 (s, 1H), 7.98 (d, *J* = 8.4 Hz, 1H), 7.82–7.76 (m, 2H), 7.66–7.61 (m, 1H), 7.48–7.42 (m, 1H), 7.24–7.16 (m, 1H), 7.12–7.08 (m, 4H), 7.06–7.02 (m, 3H), 6.88 (d, *J* = 2.4 Hz, 1H), 6.74–6.65 (m, 1H), 6.67–6.61 (m, 1H) ppm.

**<sup>13</sup>C NMR** (100 MHz, DMSO-*d*<sub>6</sub>): δ 159.5, 157.4, 147.4, 143.7, 142.9, 141.4, 135.4, 130.5, 129.8, 129.6, 129.3, 128.1, 128.0, 127.3, 127.0, 126.9, 126.8, 126.6, 125.4, 117.0, 116.2 ppm.

**HRMS** (*m/z*) (ESI): calcd for C<sub>25</sub>H<sub>18</sub>NOS 380.1104 [M+H<sup>+</sup>]; found 380.1086.

5-cyclopropyl-6-(quinolin-2-yl)-[1,1'-biphenyl]-3-ol (**3y**)

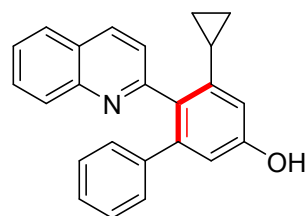

**3y**



The reaction of 2-methylquinoline (**1a**) (214.8 mg, 1.5 mmol), and 1-cyclopropyl-5-phenylpenta-1,4-diyne-3-one (**2o**) (97.1 mg, 0.5 mmol) at 100 °C for 9 h, isolated by column chromatography (silica gel, petroleum ether/AcOEt = 10/1), affords 113.0 mg (67%) of **3y** as light yellow solid. **m.p.** 118-120 °C.

**<sup>1</sup>H NMR** (400 MHz, DMSO-*d*<sub>6</sub>): δ 9.65 (s, 1H), 8.07 (d, *J* = 8.4 Hz, 1H), 7.96 (d, *J* = 8.4 Hz, 1H), 7.86 (d, *J* = 8.0 Hz, 1H), 7.70–7.62 (m, 1H), 7.54–7.48 (m, 1H), 7.12 (d, *J* = 8.4 Hz, 1H), 7.08–7.02 (m, 5H), 6.66 (d, *J* = 2.4 Hz, 1H), 6.47 (d, *J* = 2.3 Hz, 1H), 1.71–1.62 (m, 1H), 0.58 (s, 4H) ppm.

**<sup>13</sup>C NMR** (100 MHz, DMSO-*d*<sub>6</sub>): δ 160.3, 157.7, 147.6, 143.8, 142.3, 141.8, 135.5, 132.0, 129.7, 129.6, 129.3, 128.1, 128.1, 126.8, 126.6, 126.4, 125.2, 114.4, 110.3, 13.8, 9.3 ppm.

**HRMS** (*m/z*) (ESI): calcd for C<sub>24</sub>H<sub>20</sub>NO 338.1539 [M+H<sup>+</sup>]; found 338.1537.

6-(6-ethoxyquinolin-2-yl)-5-(naphthalen-2-yl)-[1,1'-biphenyl]-3-ol (**3z**)

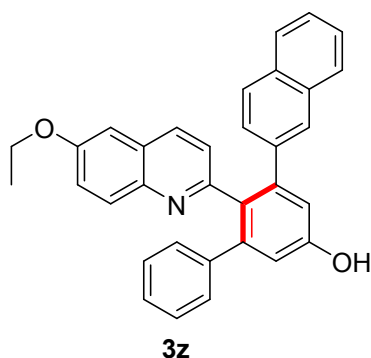

The reaction of 2-methylquinoline (**1a**) (214.8 mg, 1.5 mmol), and 1-(naphthalen-2-yl)-5-phenylpenta-1,4-diyne-3-one (**2p**) (140.2 mg, 0.5 mmol) at 100 °C for 8 h, isolated by column chromatography (silica gel, petroleum ether/AcOEt = 10/1), affords 147.3 mg (63%) of **3z** as light yellow solid. **m.p.** 136-137 °C.

**<sup>1</sup>H NMR** (400 MHz, DMSO-*d*<sub>6</sub>): δ 9.93 (s, 1H), 7.76 (d, *J* = 1.1 Hz, 1H), 7.71–7.63 (m, 3H), 7.52–7.46 (m, 2H), 7.42–7.36 (m, 2H), 7.16–7.11 (m, 1H), 7.10–7.04 (m, 7H), 6.95–6.88 (m, 2H), 6.88 (d, *J* = 2.5 Hz, 1H), 4.03 (q, *J* = 7.6 Hz, 2H), 1.32 (t, *J* = 7.2 Hz, 3H) ppm.

**<sup>13</sup>C NMR** (100 MHz, DMSO-*d*<sub>6</sub>): δ 157.2, 156.9, 156.7, 143.5, 143.2, 143.2, 141.8, 139.5, 133.8, 133.0, 131.8, 130.8, 130.5, 128.3, 128.2, 128.1, 127.8, 127.1, 127.0, 126.8, 126.5, 126.3, 125.7, 122.1, 116.7, 116.5, 106.5, 63.8, 15.0 ppm.

**HRMS** (*m/z*) (ESI): calcd for C<sub>33</sub>H<sub>26</sub>NO<sub>2</sub> 468.1958 [M+H<sup>+</sup>]; found 468.1956.

# Copies of $^1\text{H}$ NMR and $^{13}\text{C}$ NMR spectra of all compounds

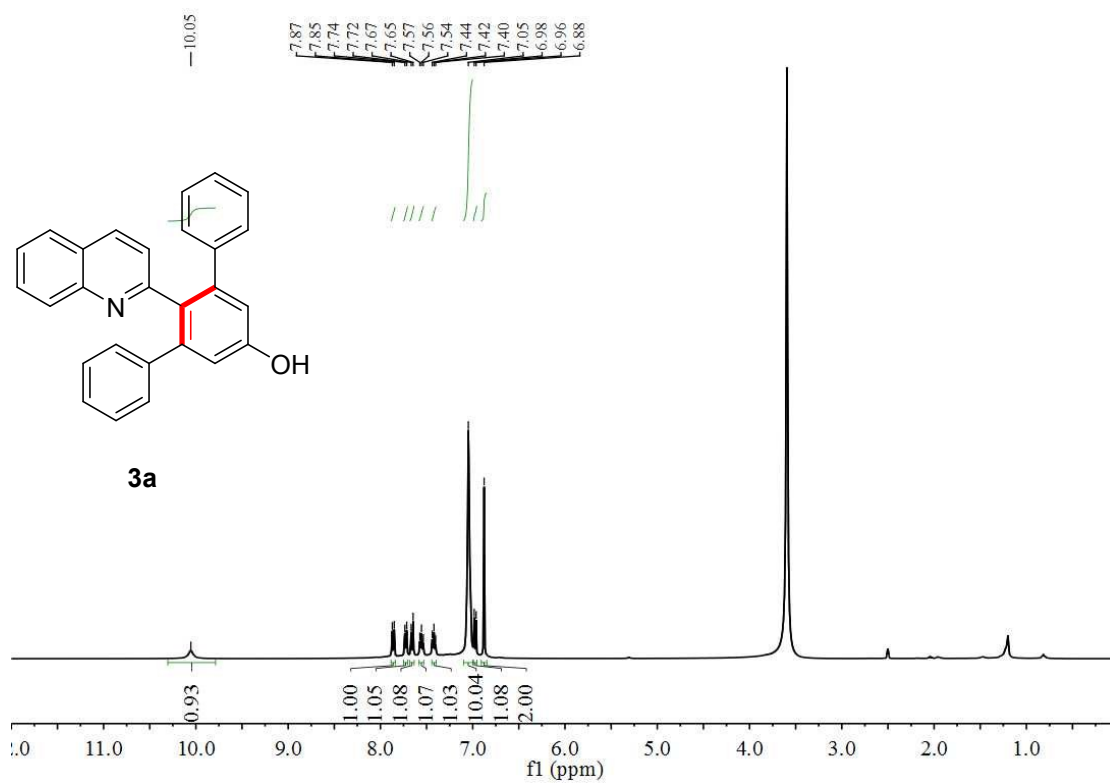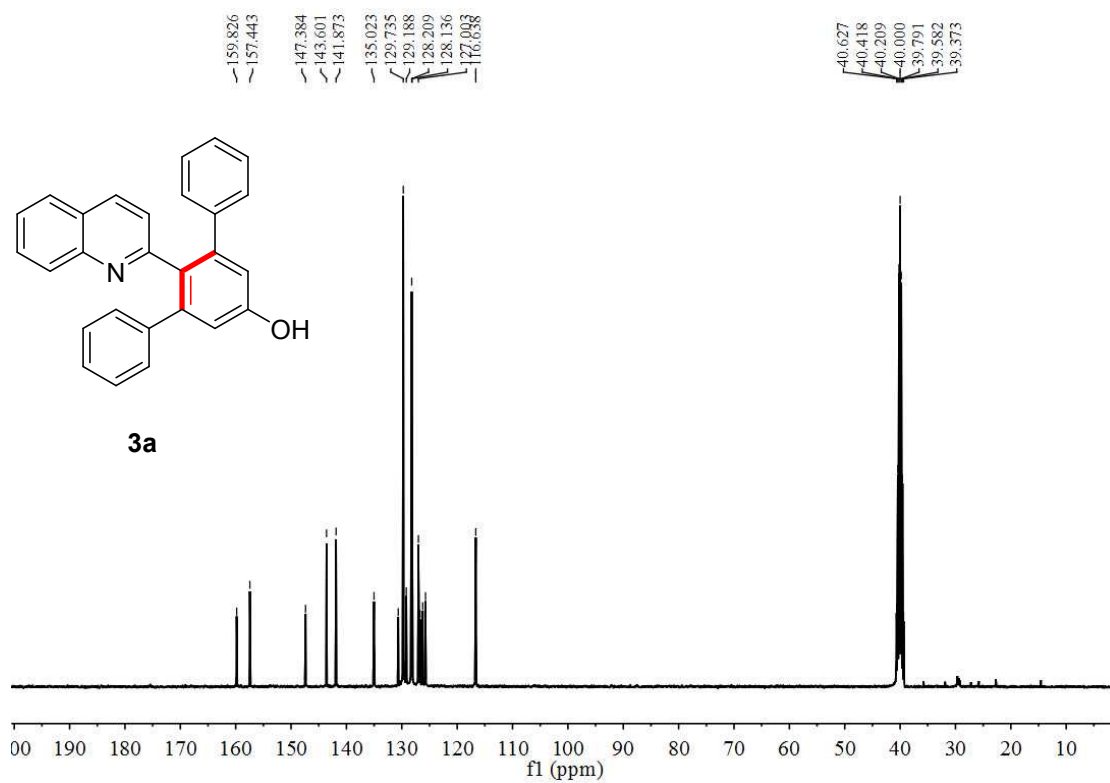

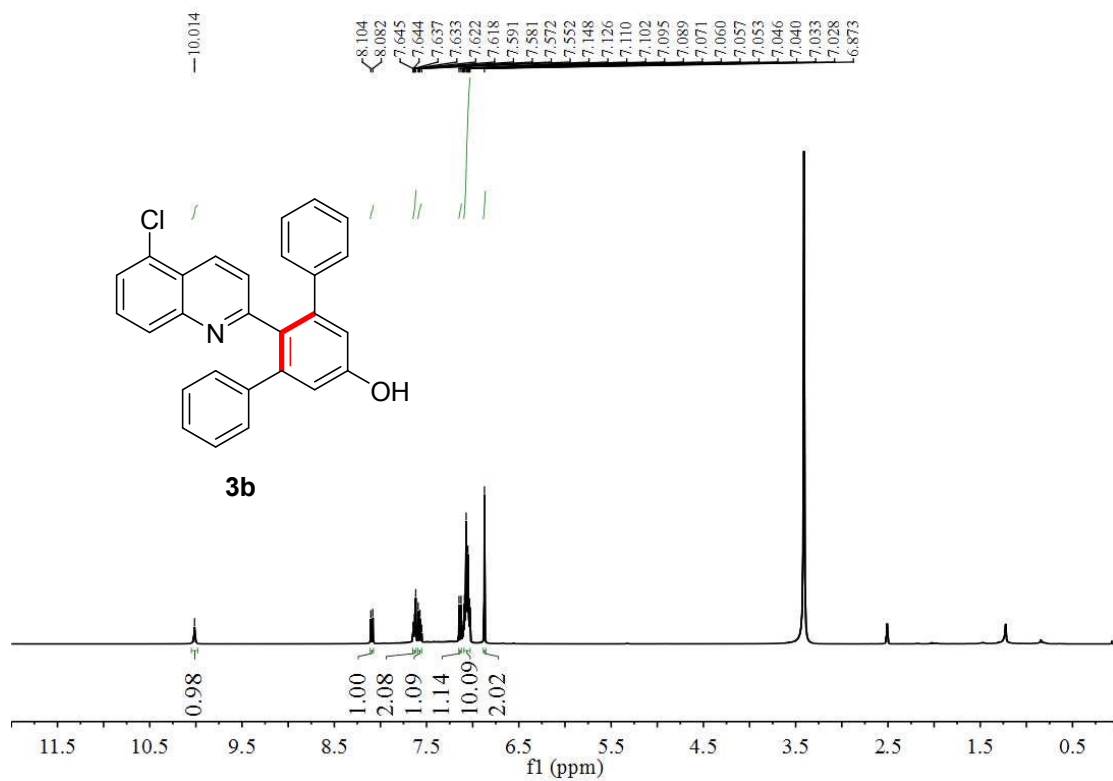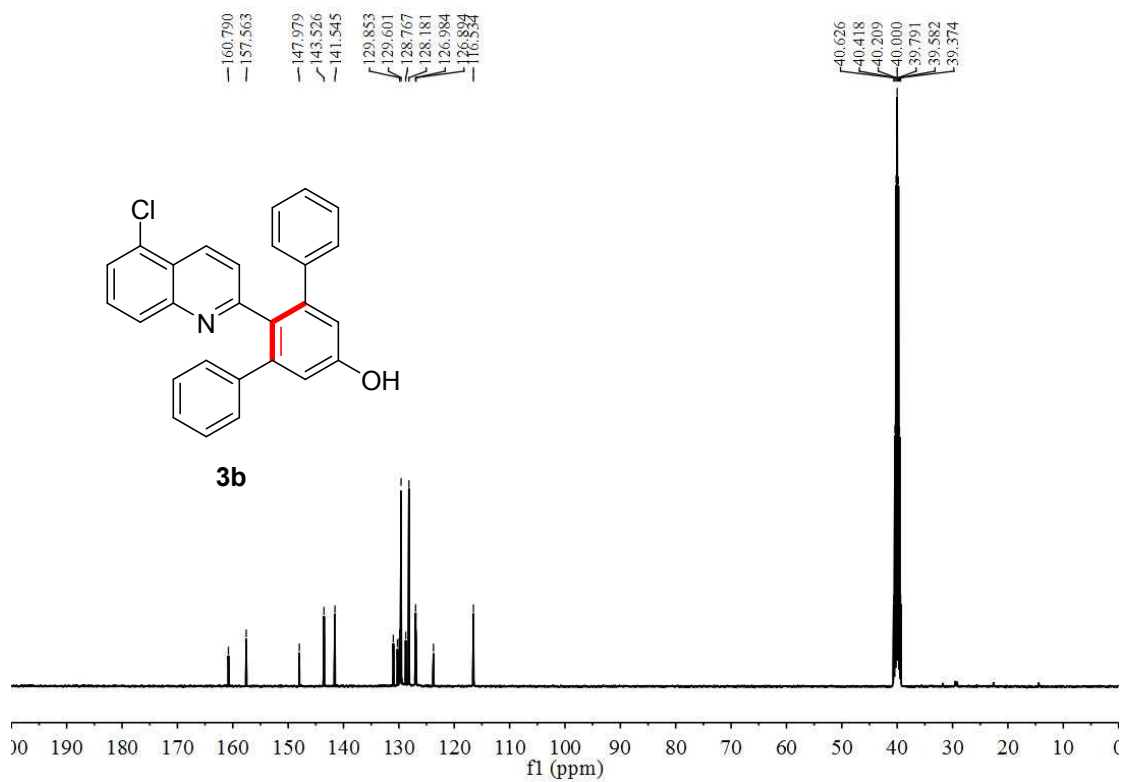

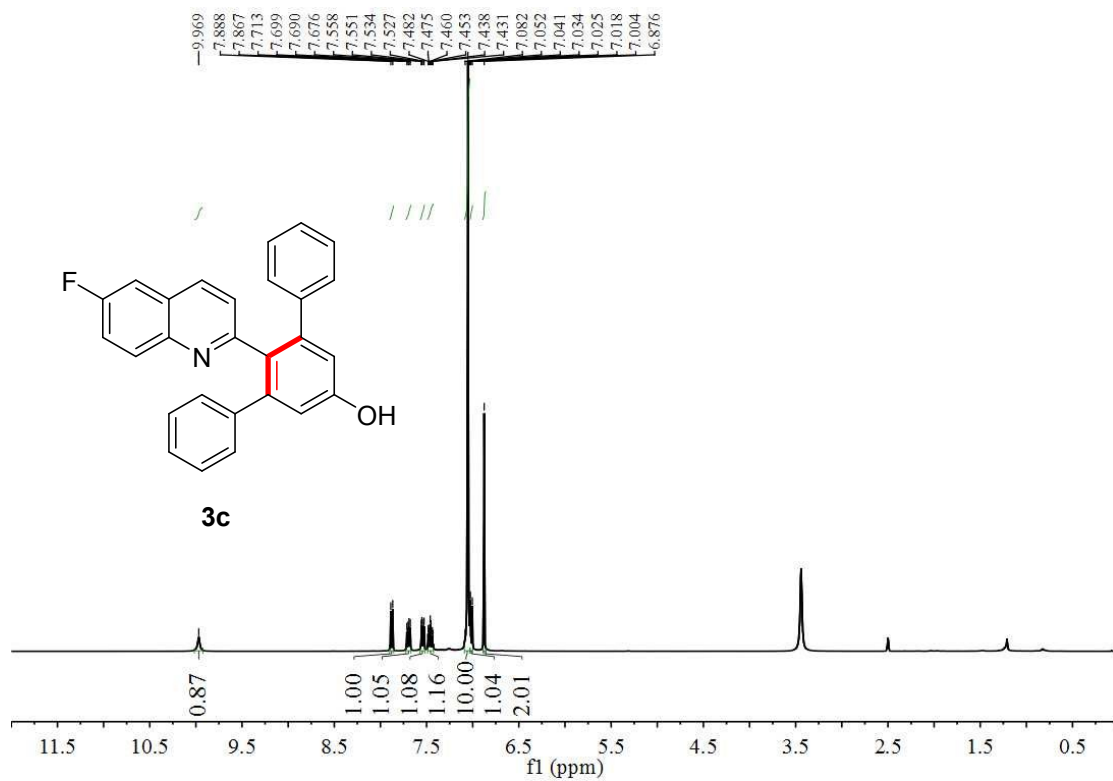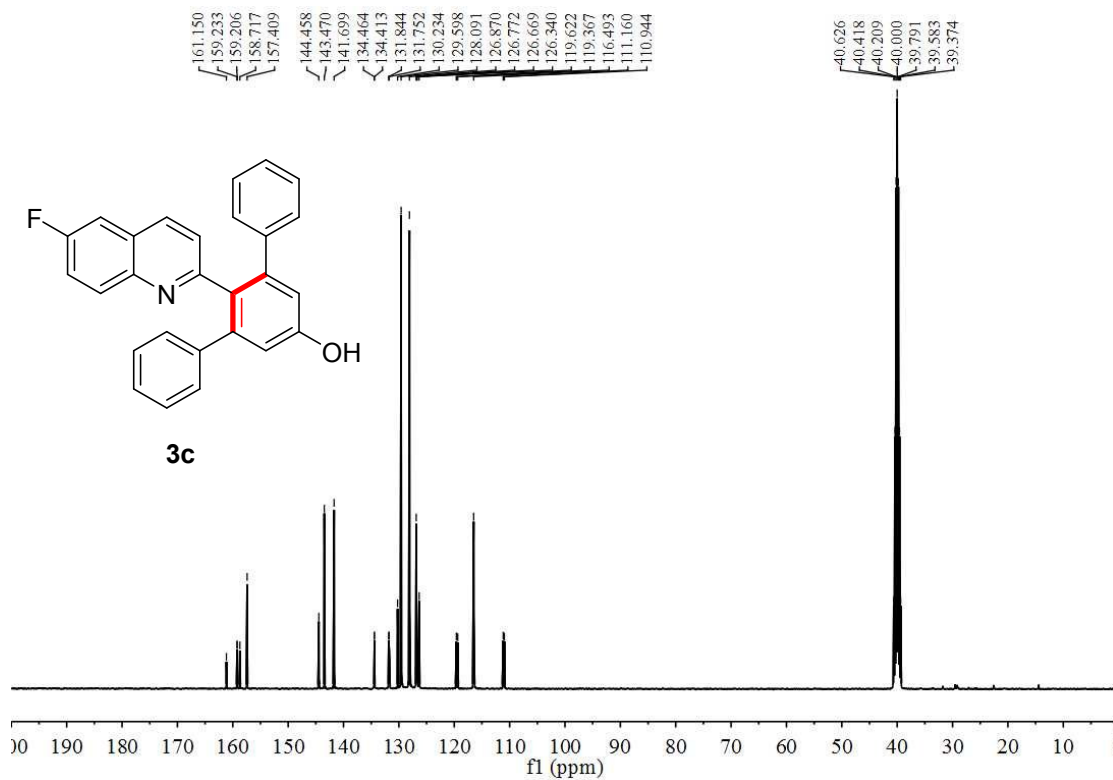

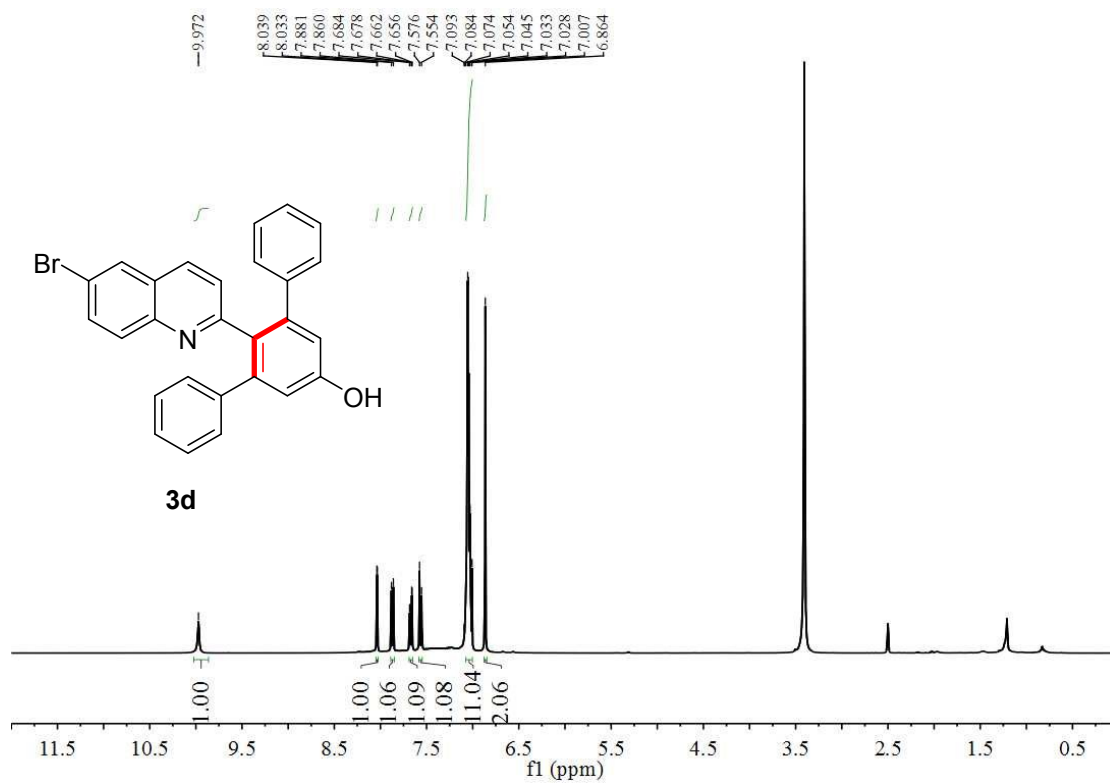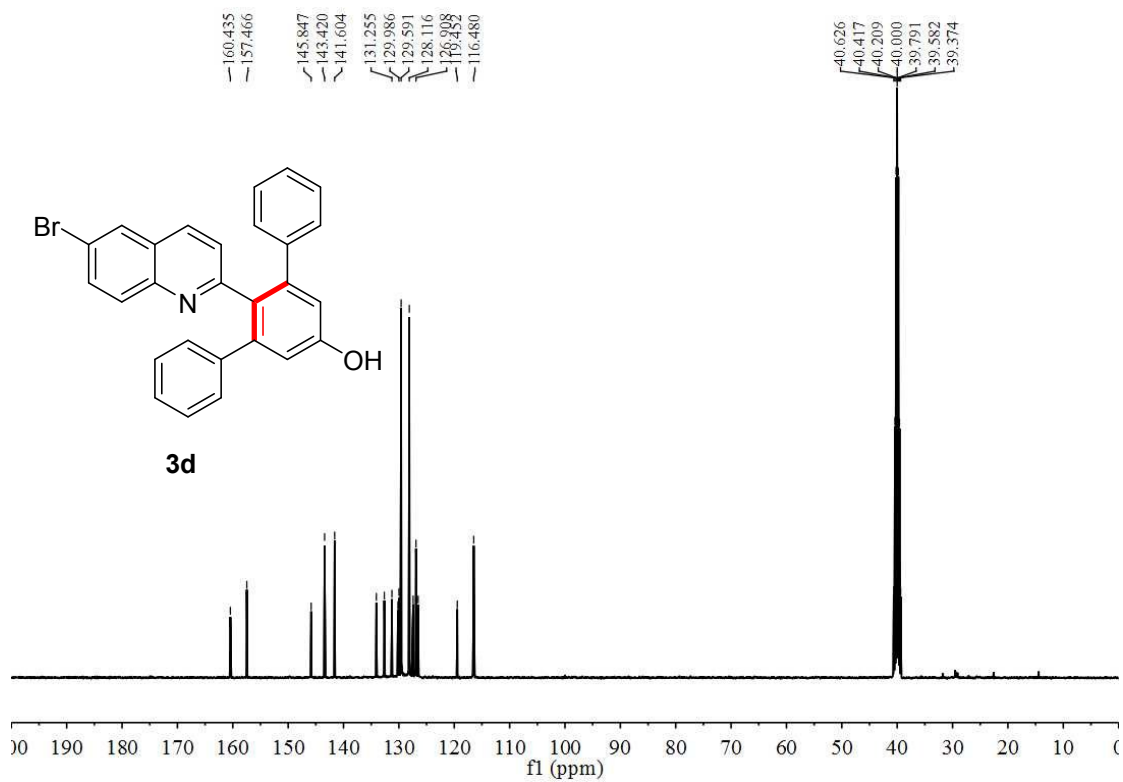

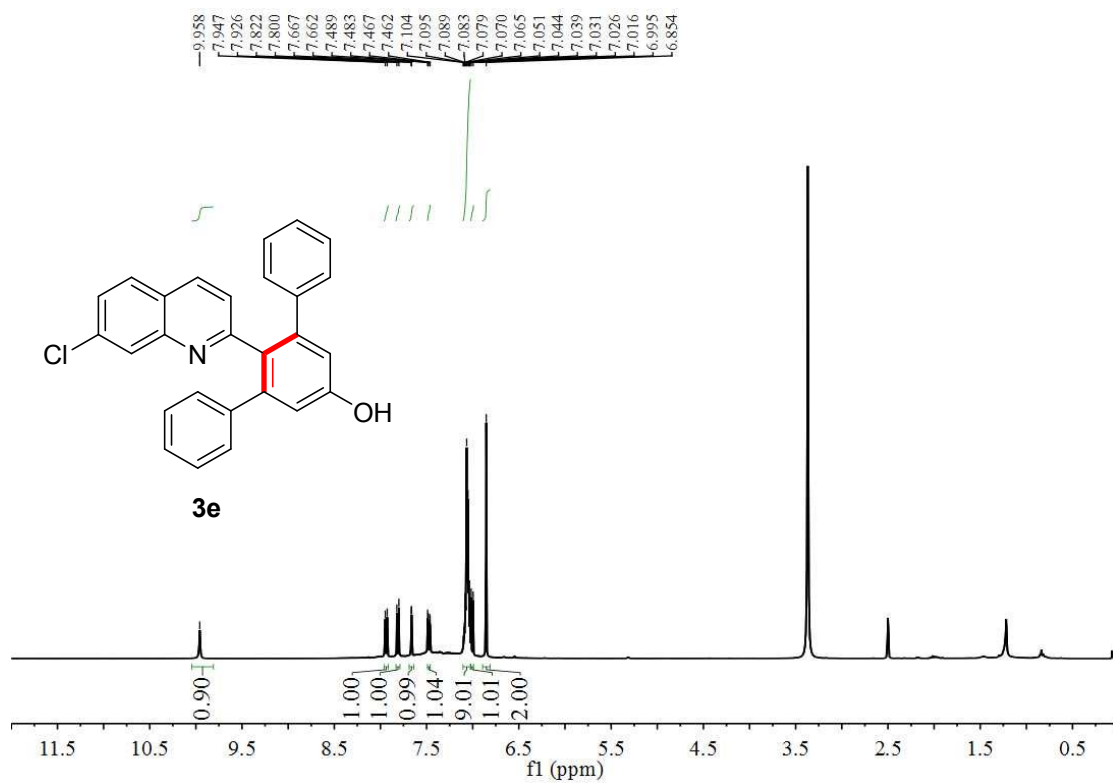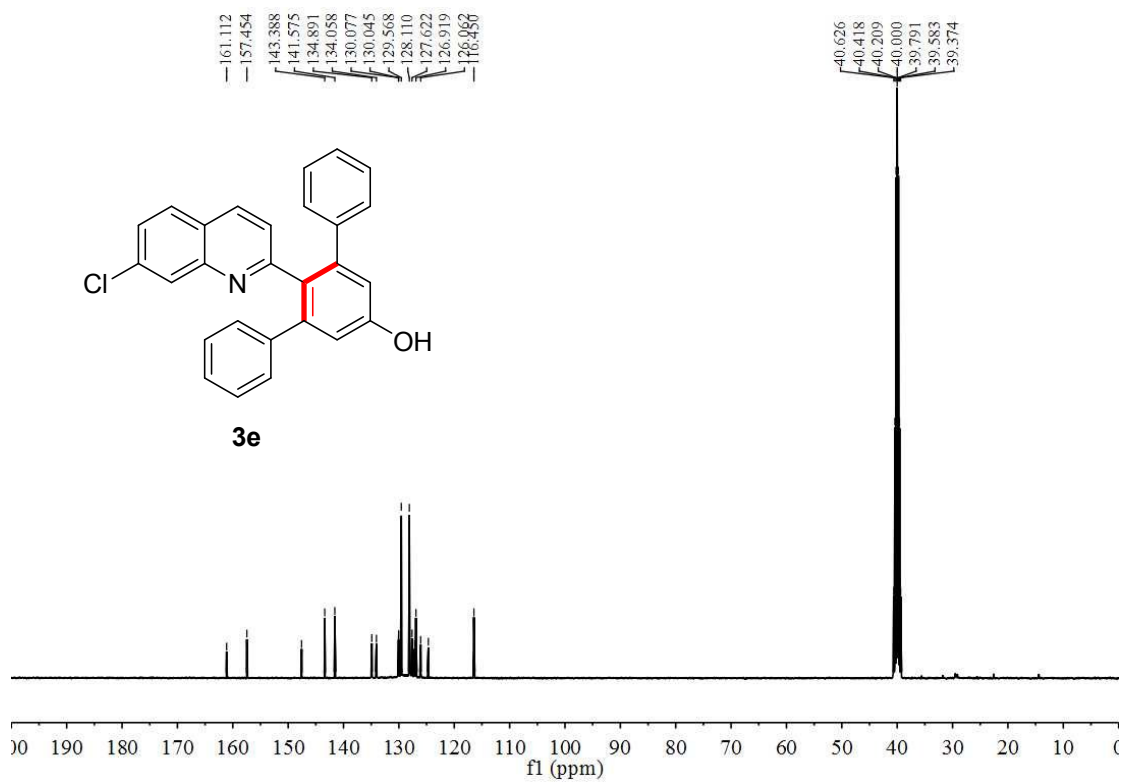

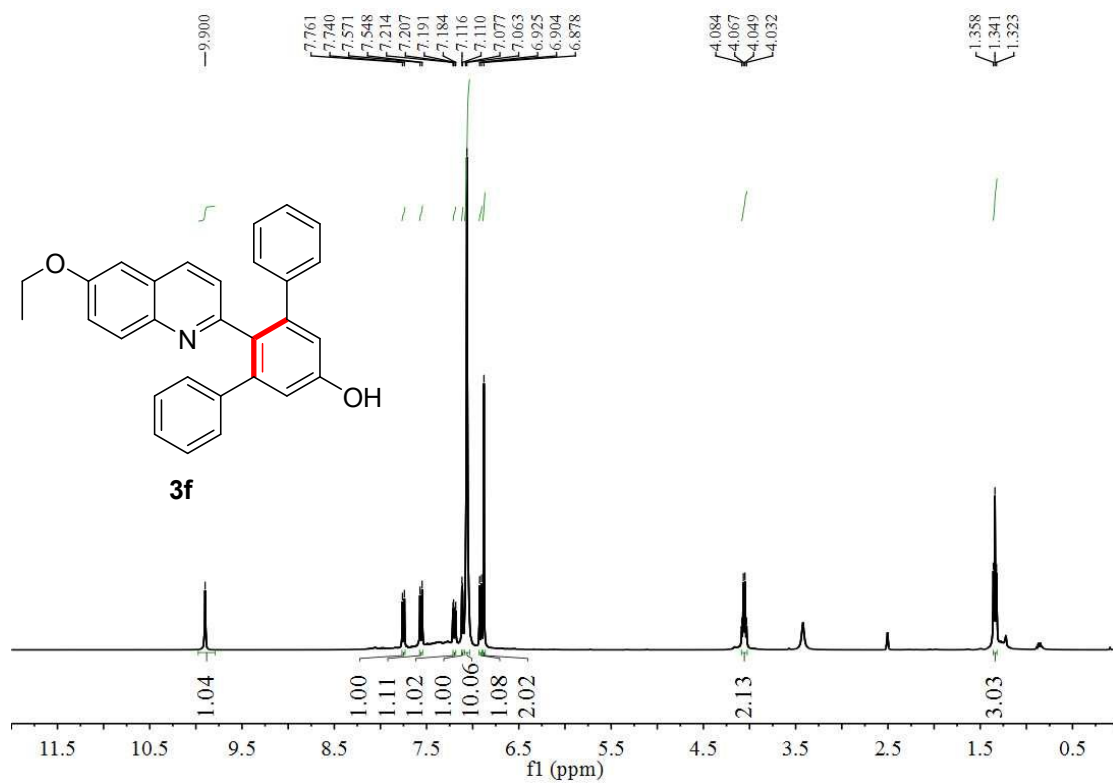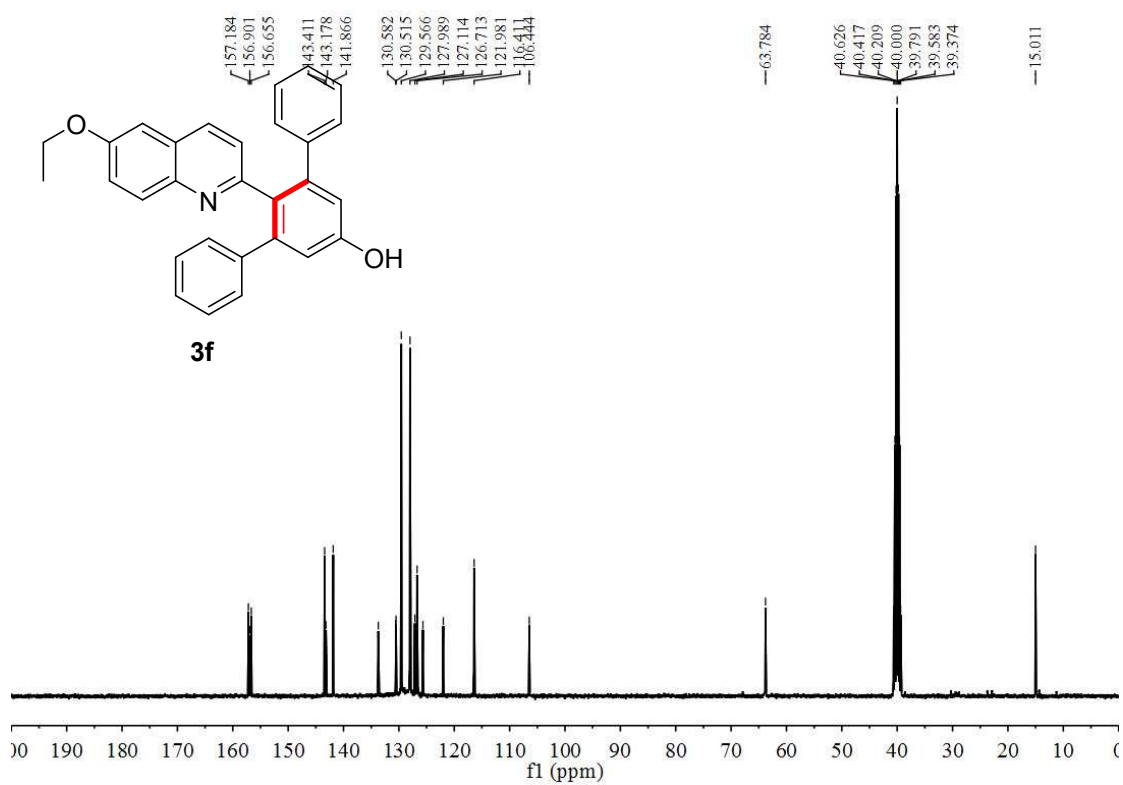

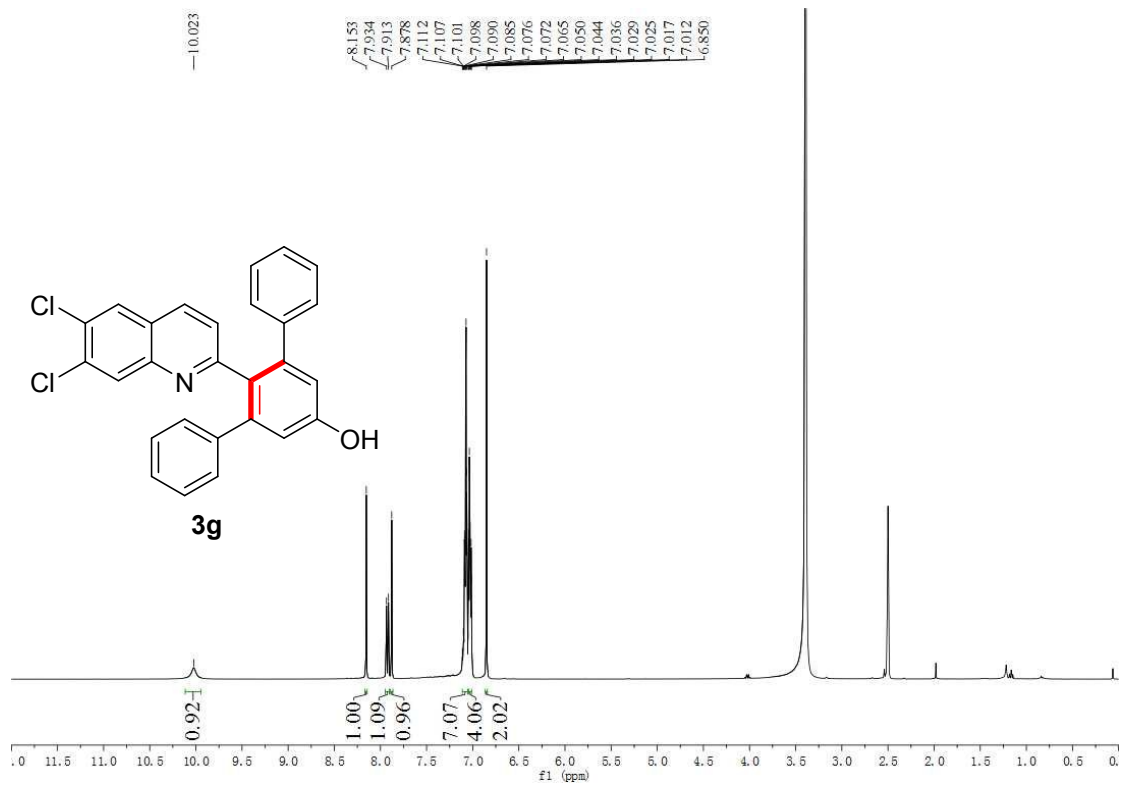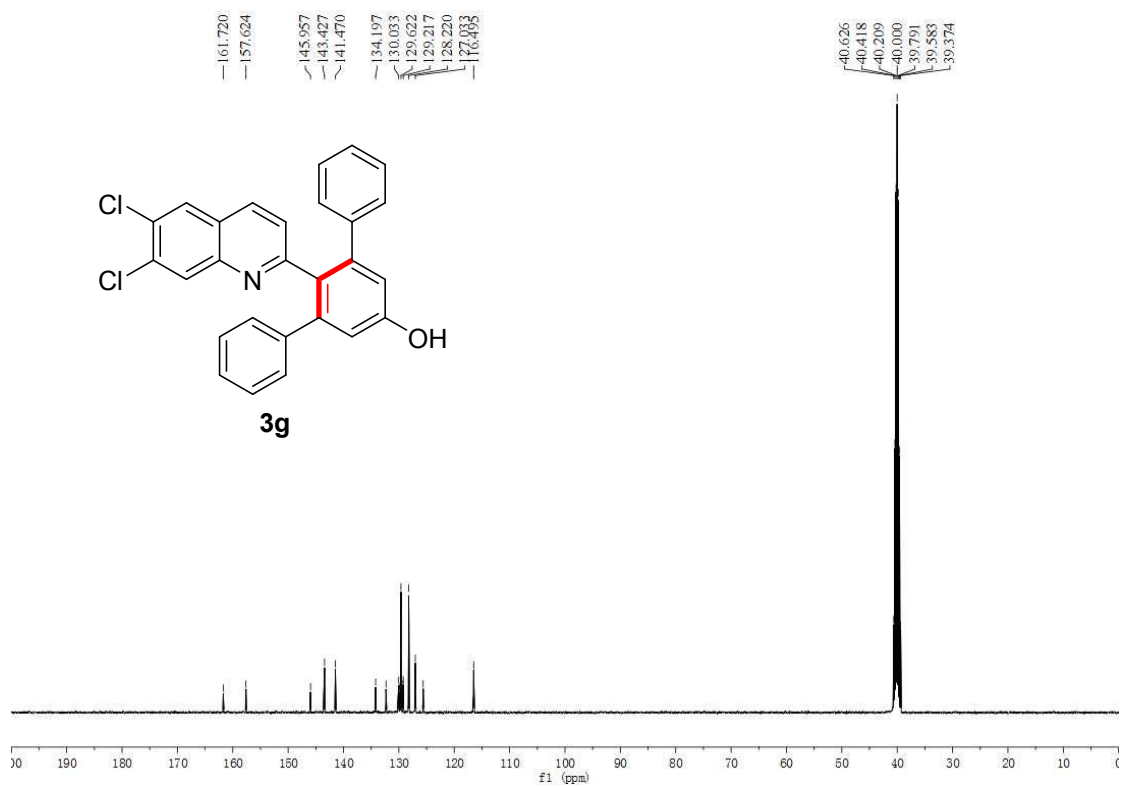



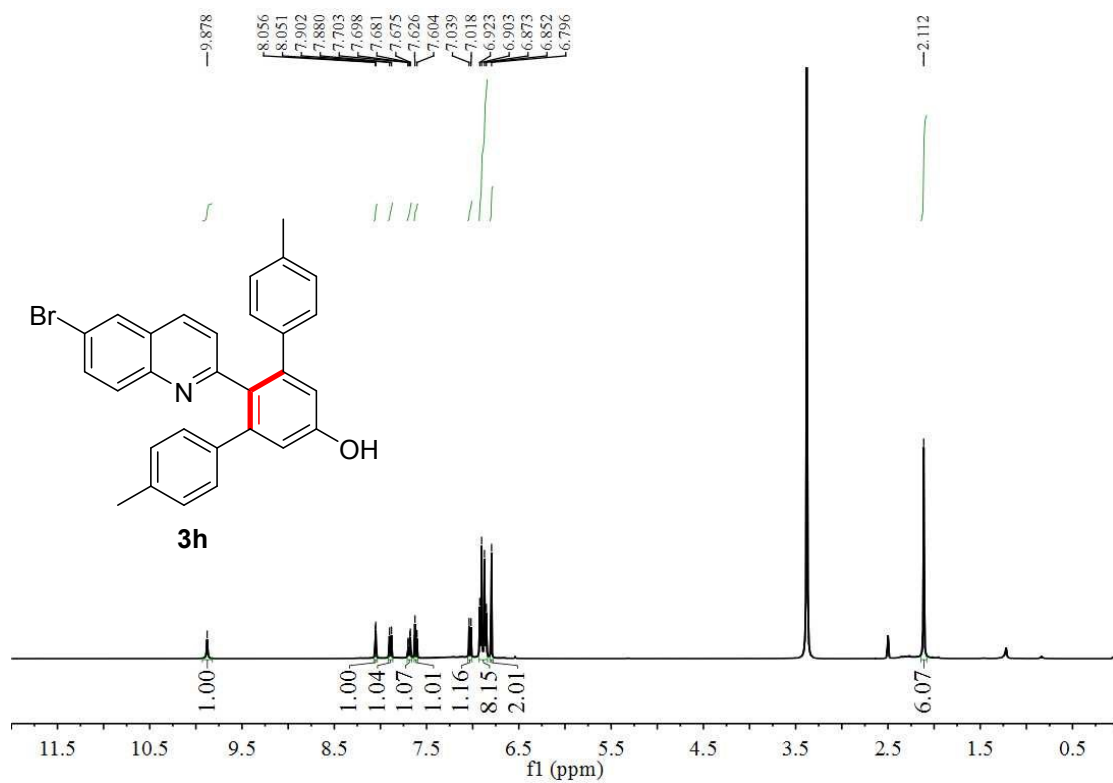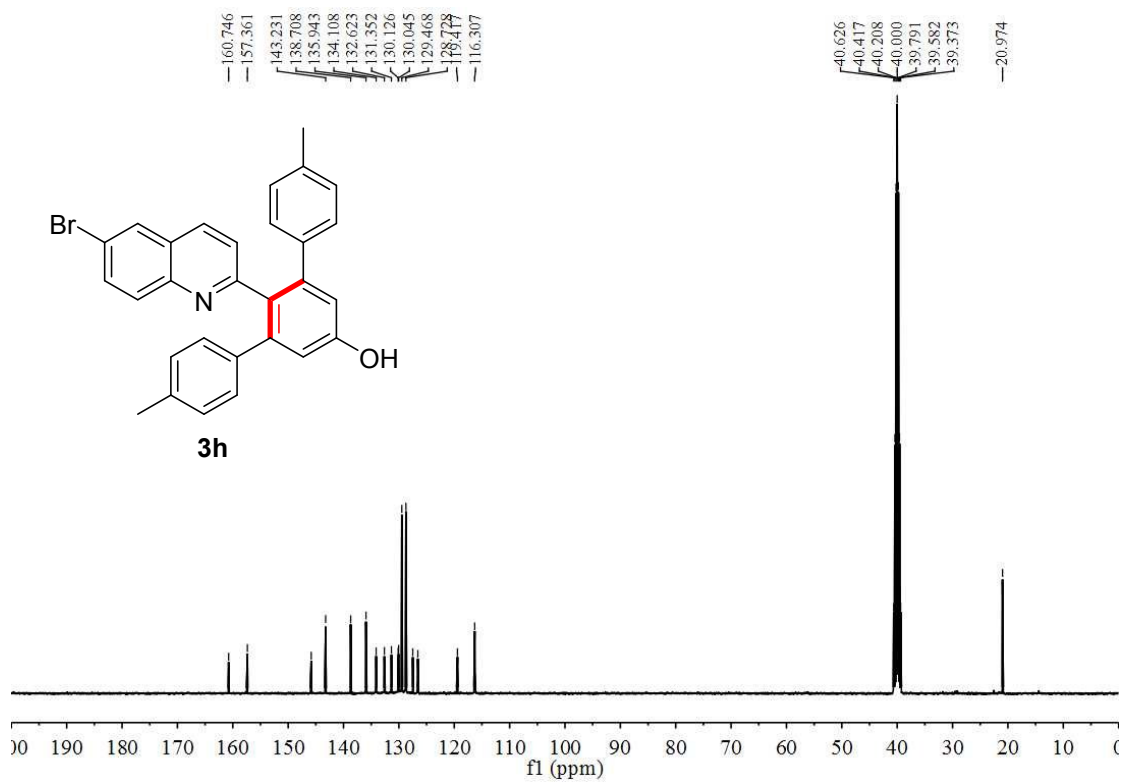

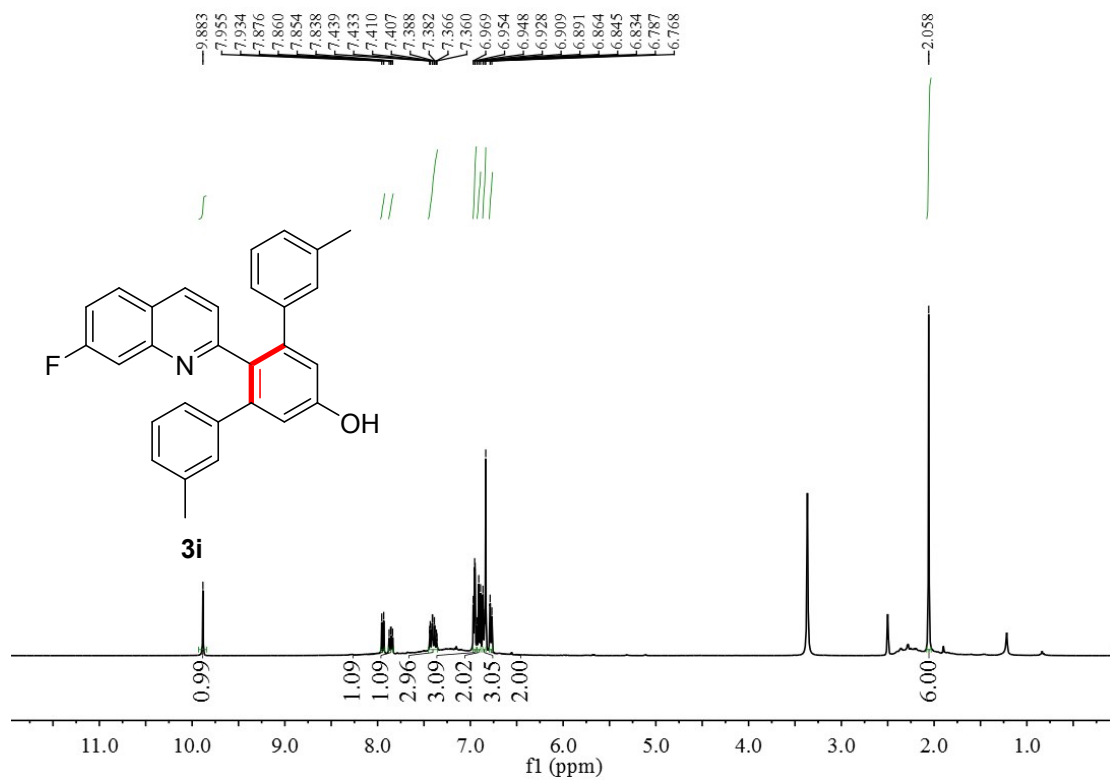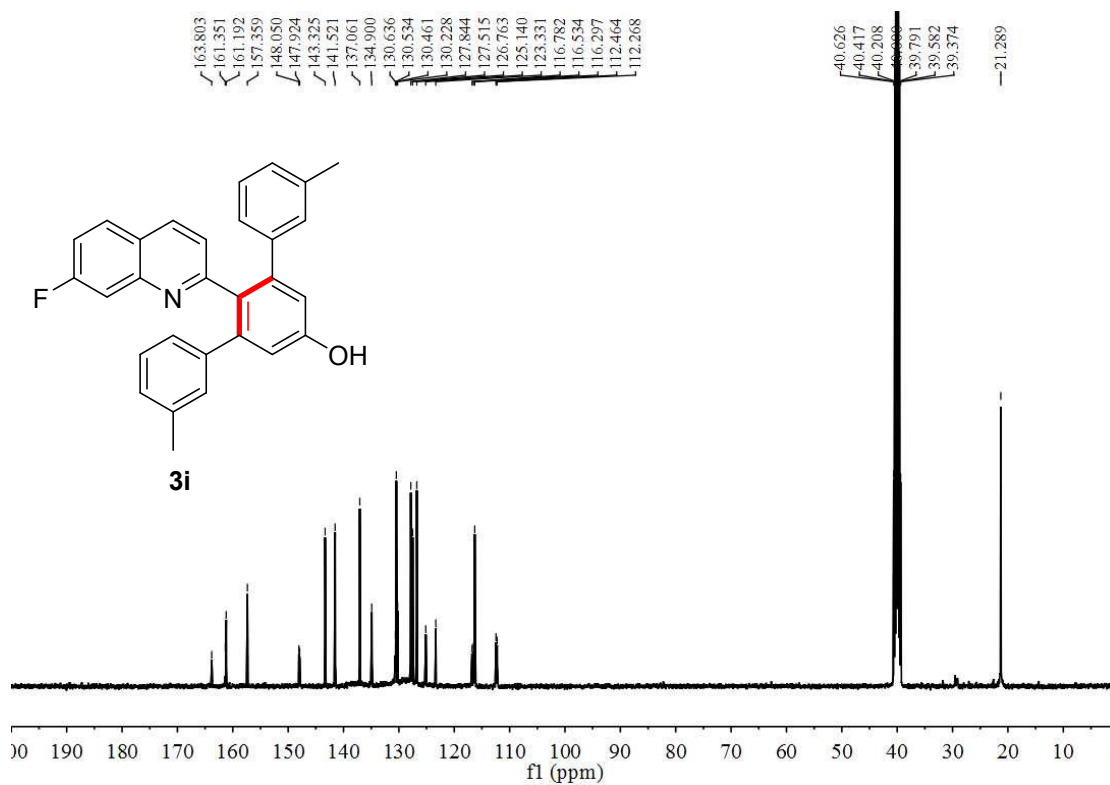



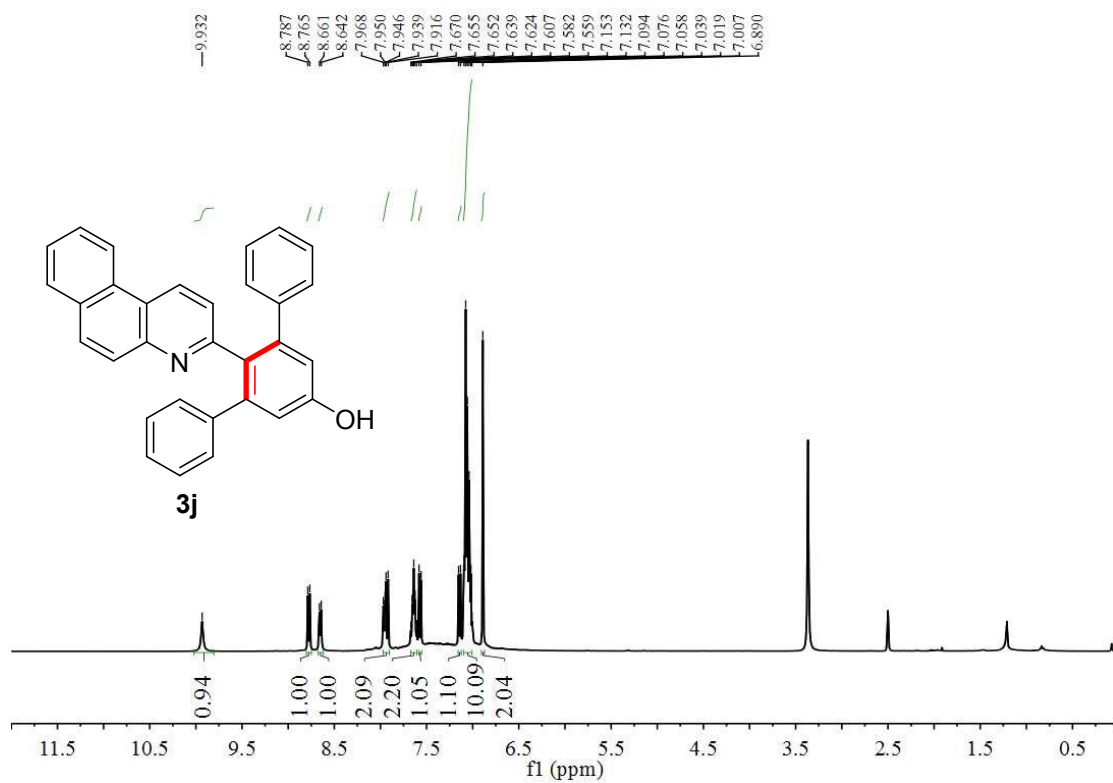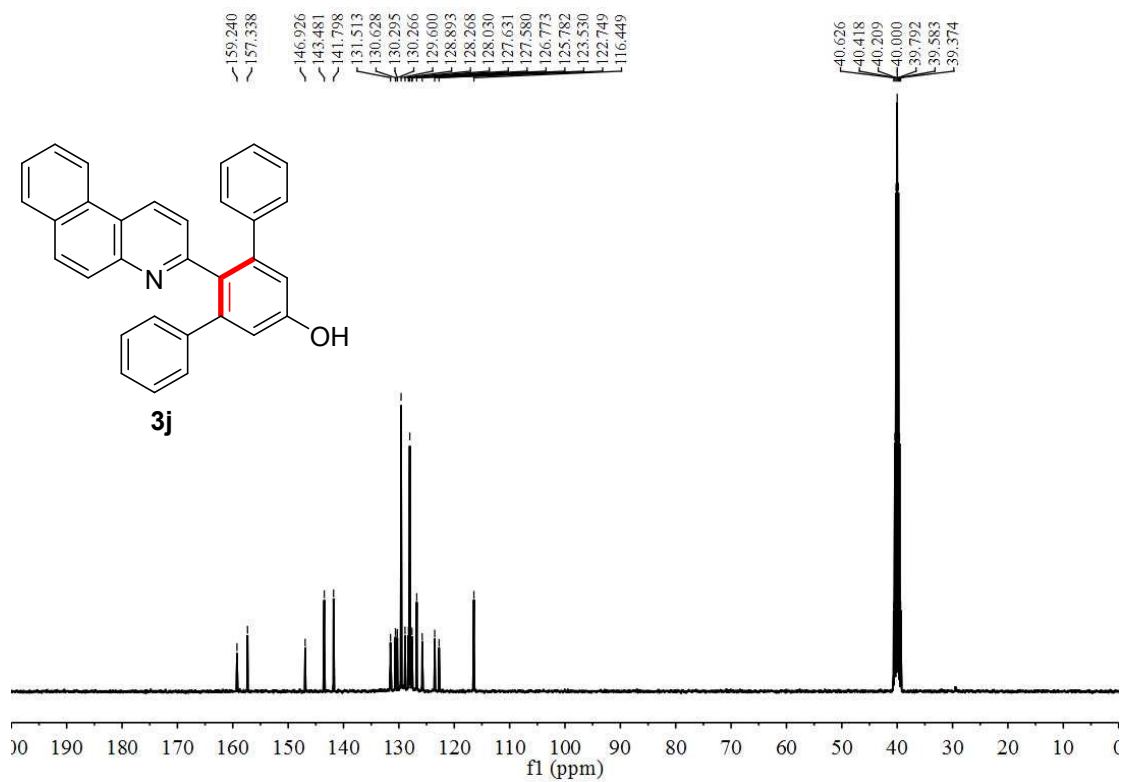

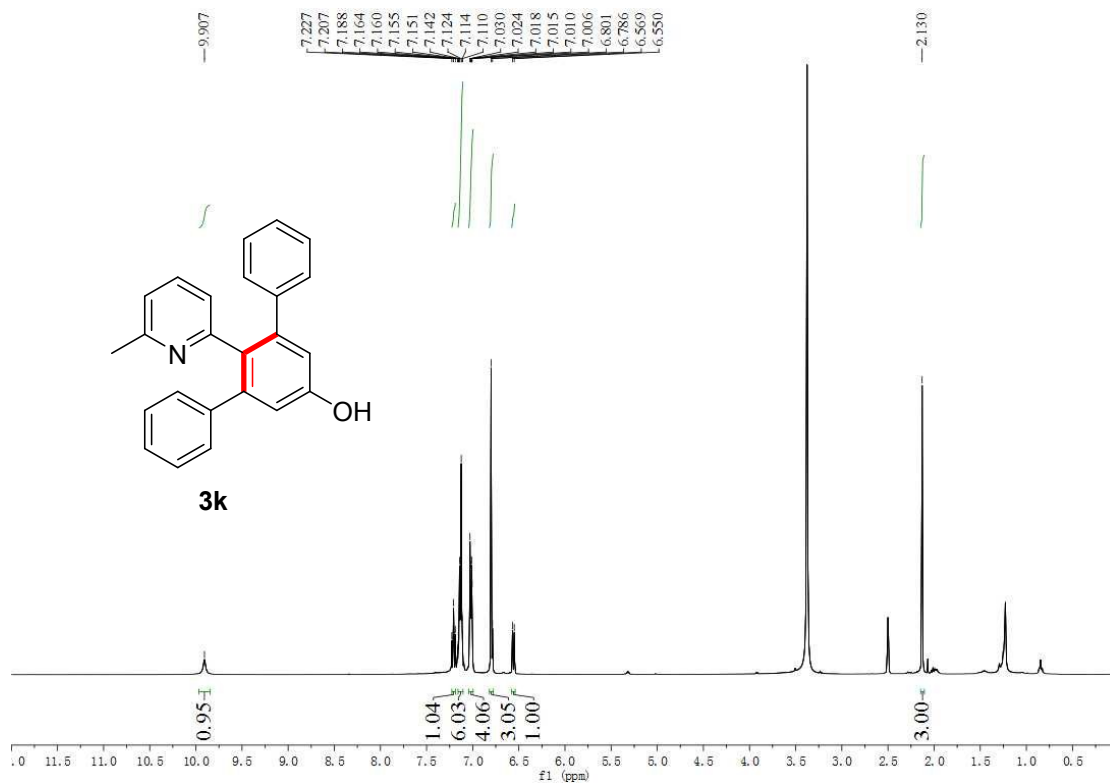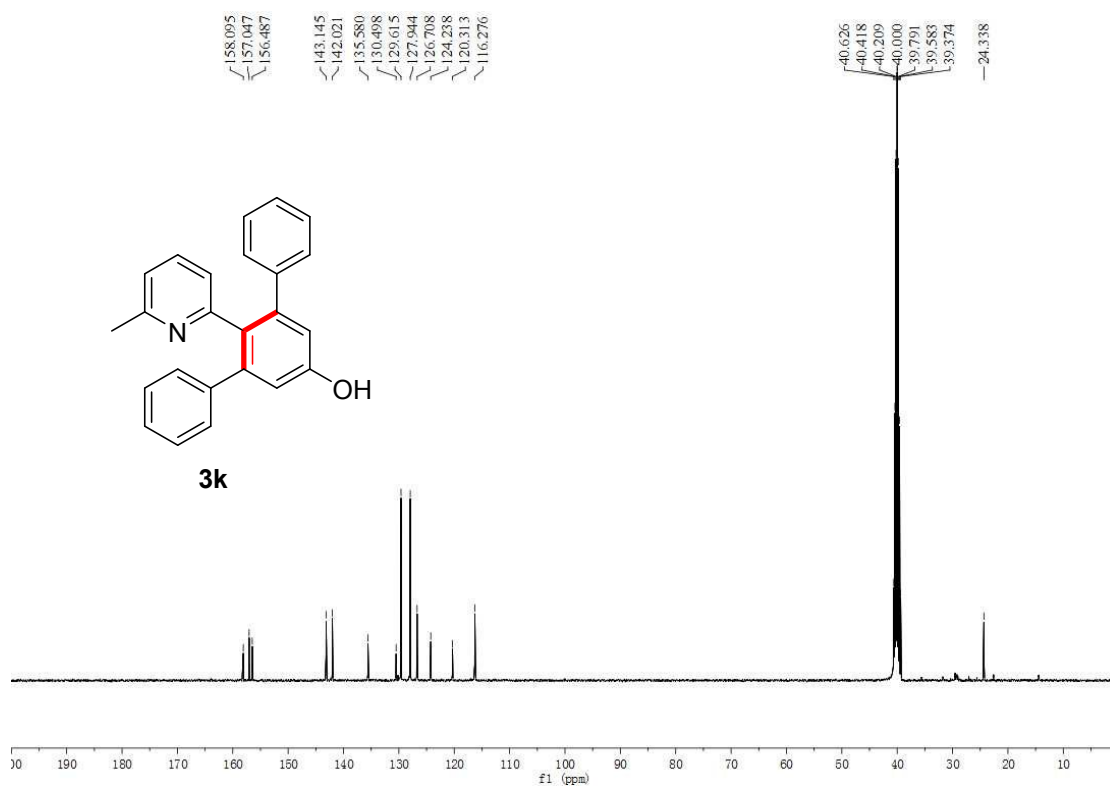

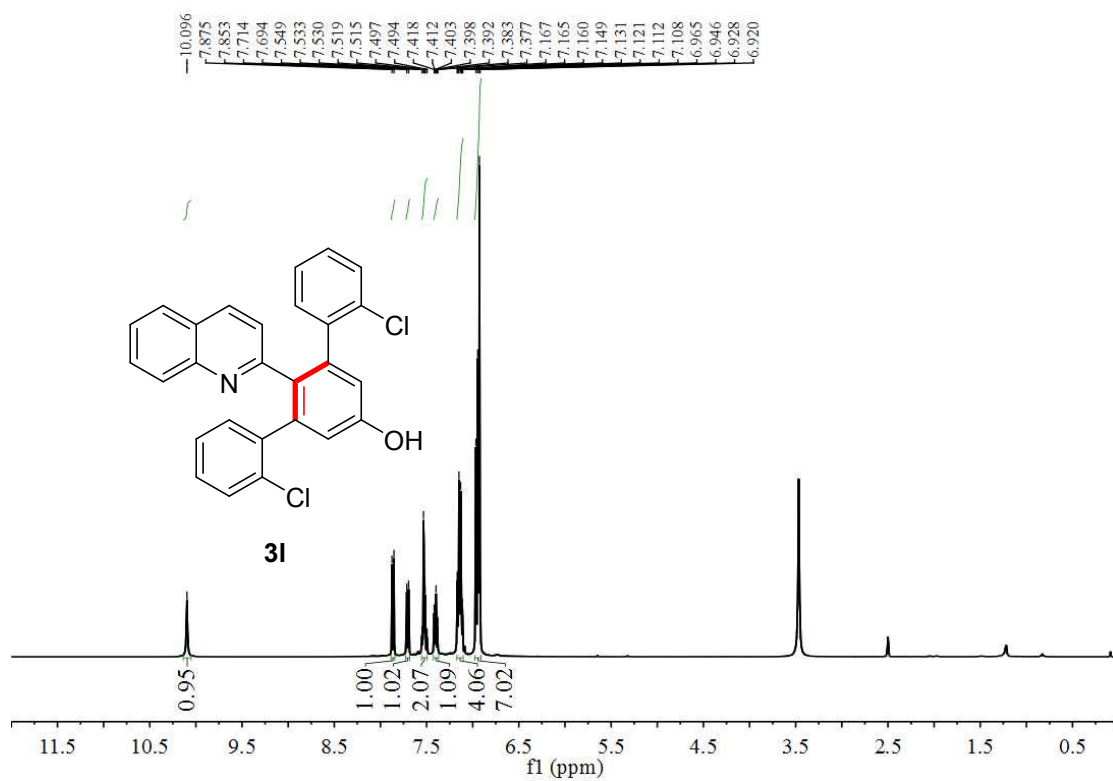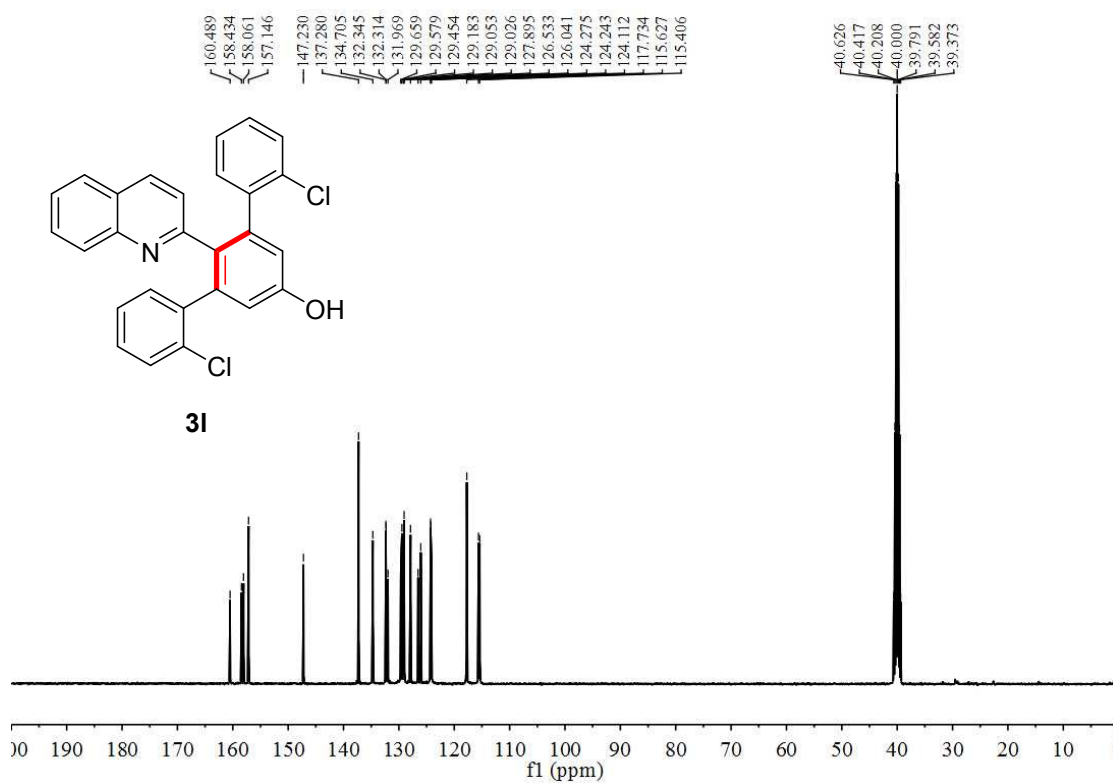

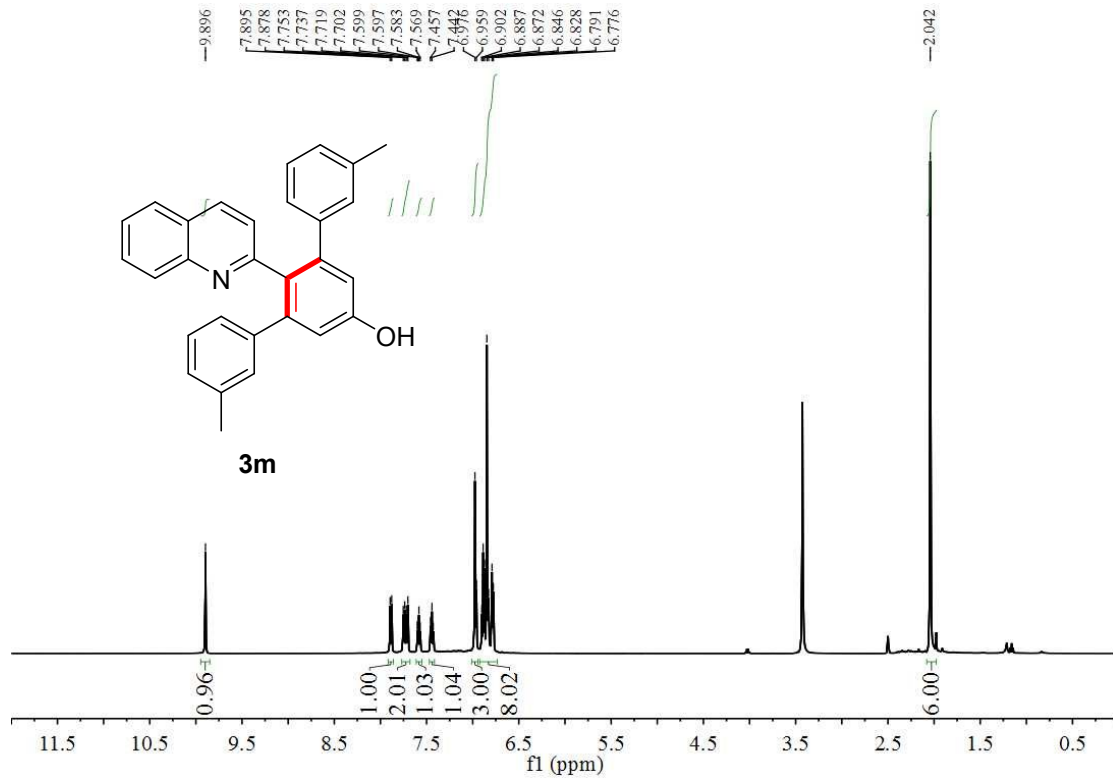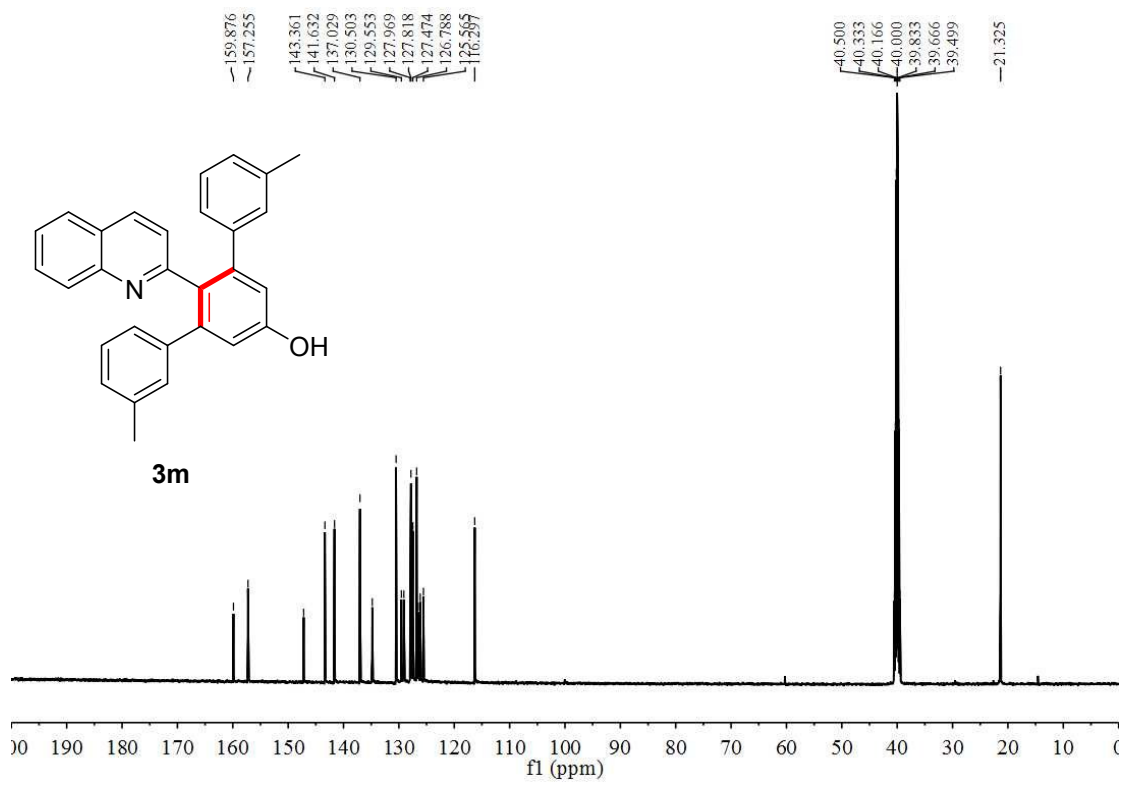

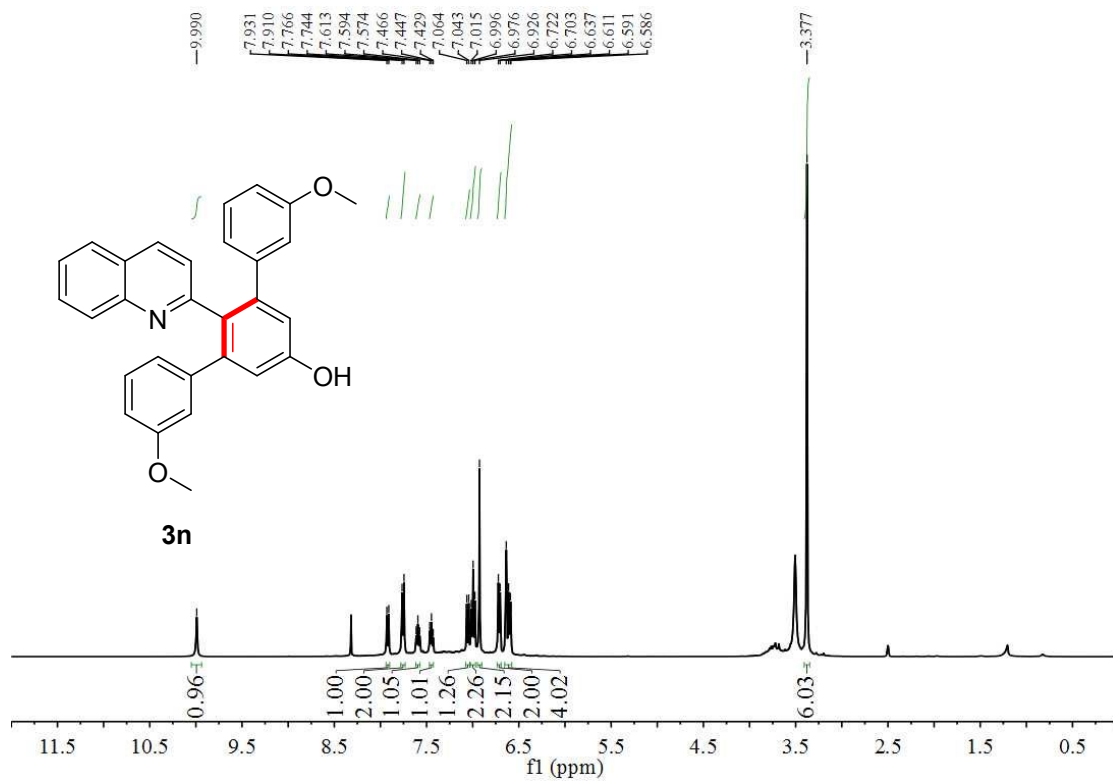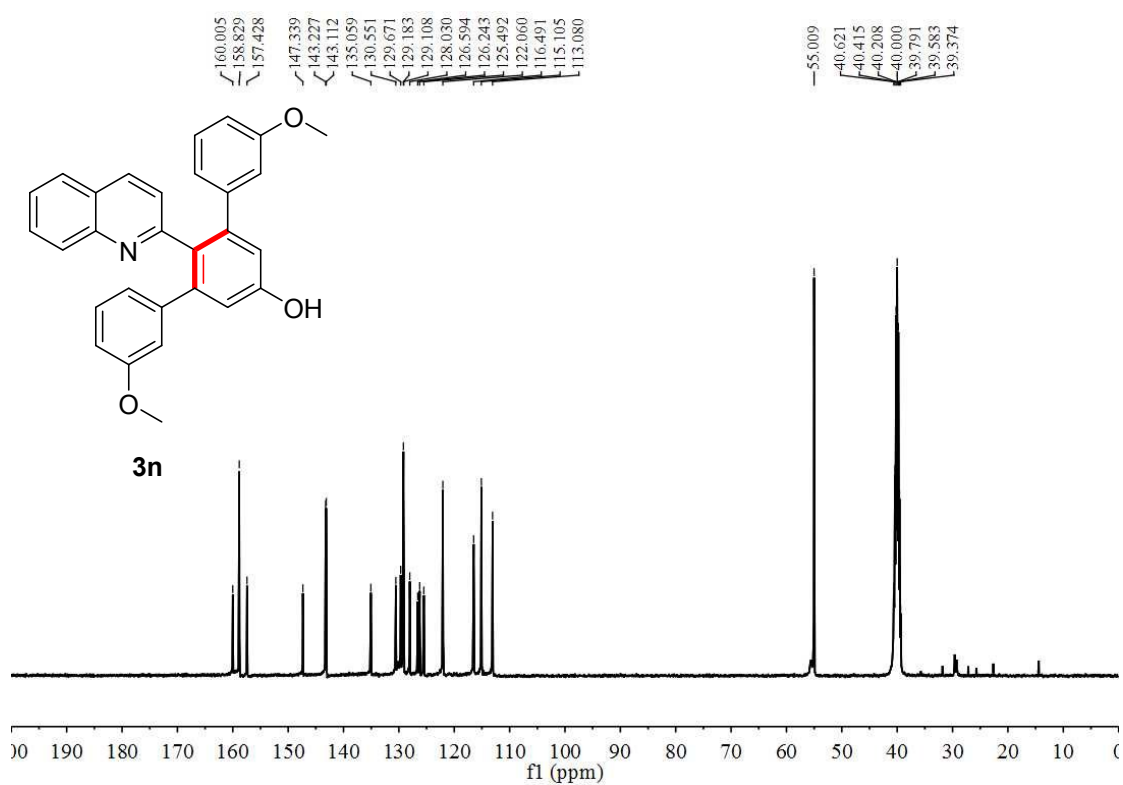



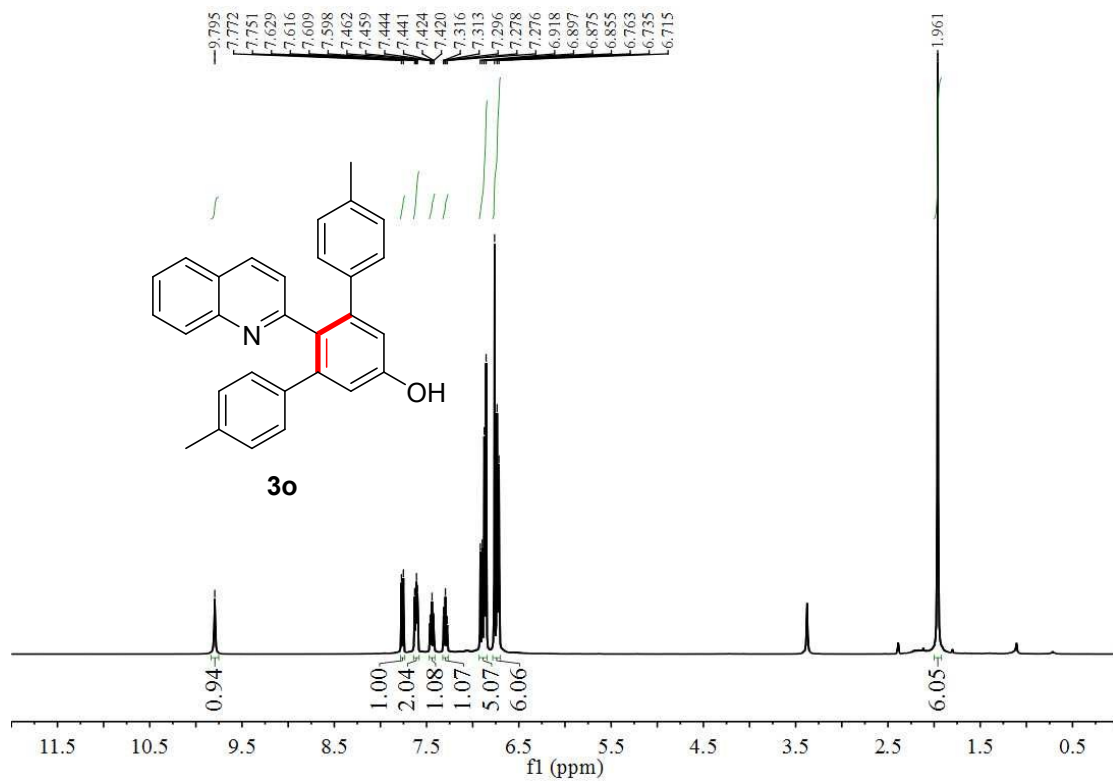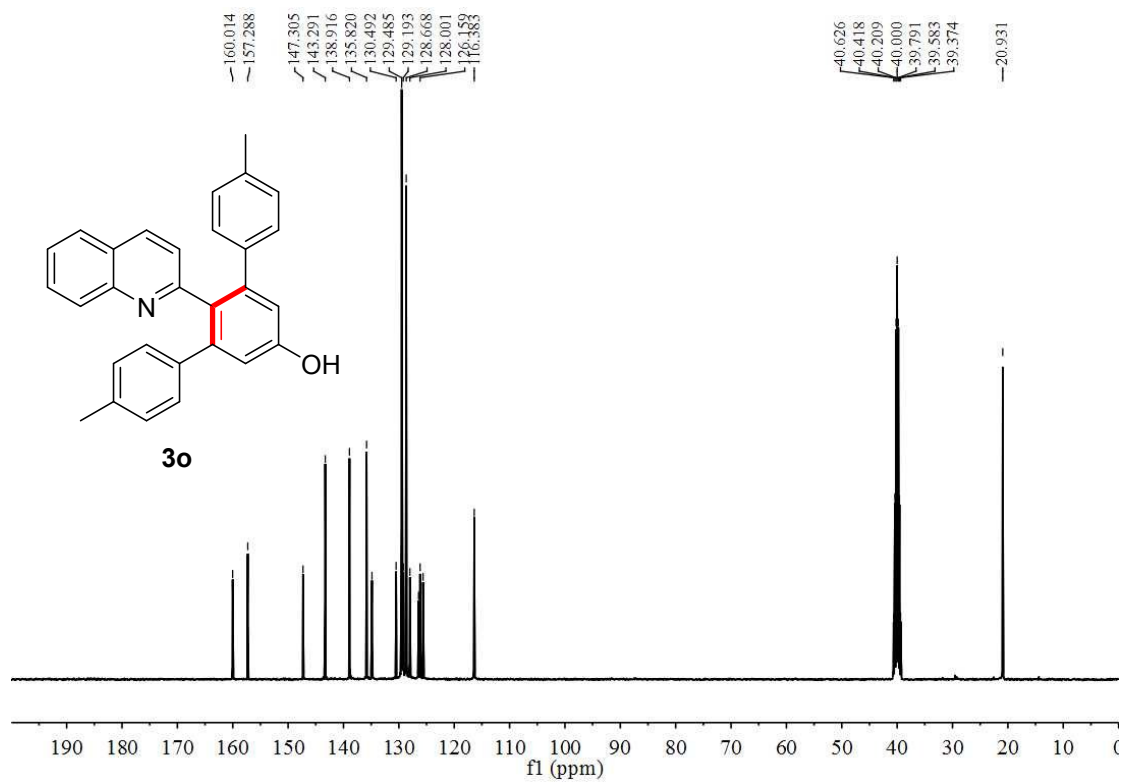

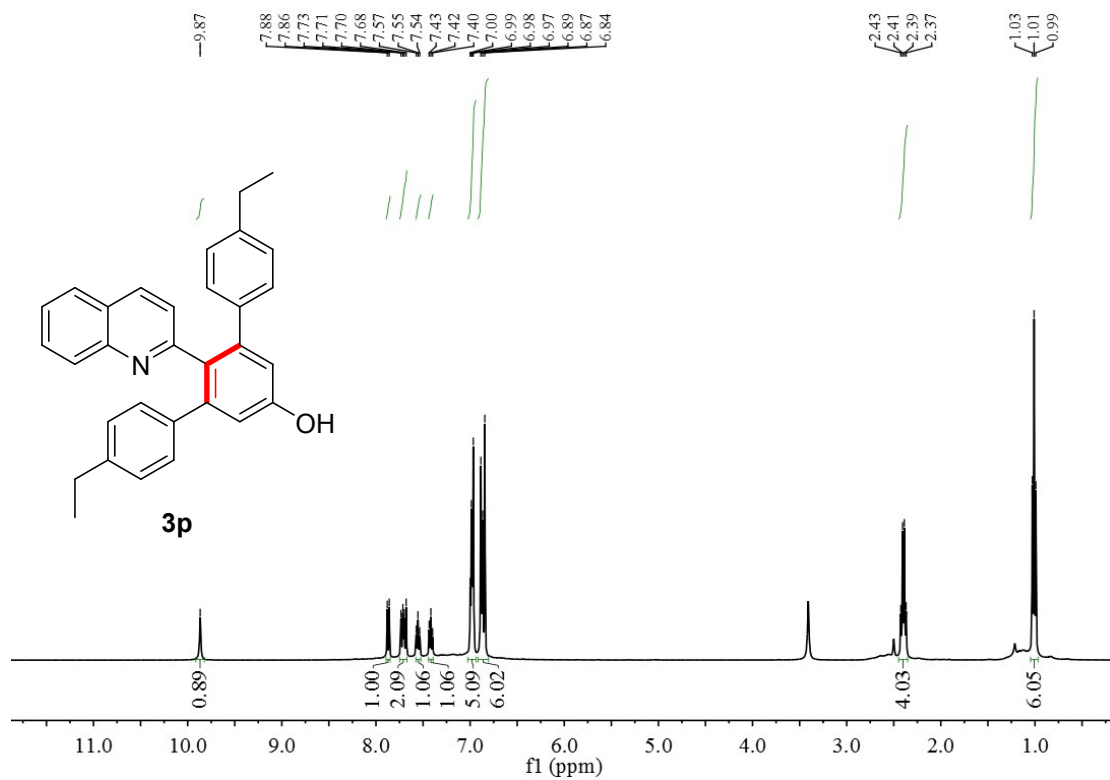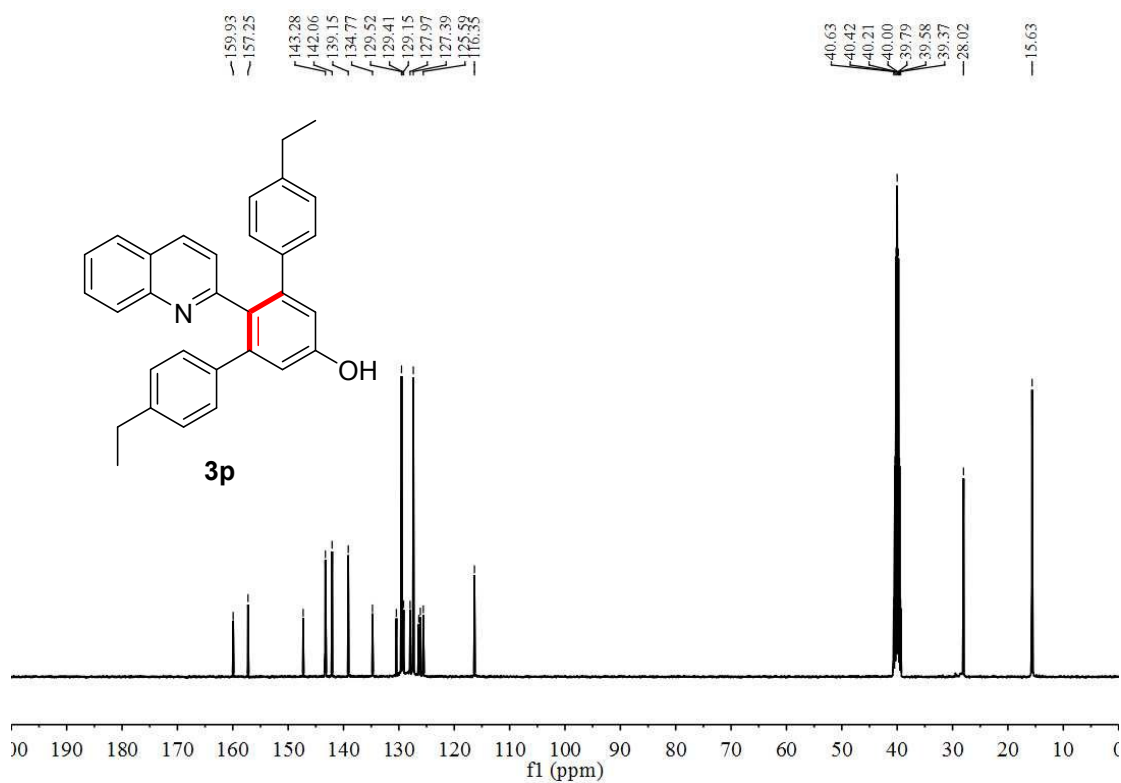

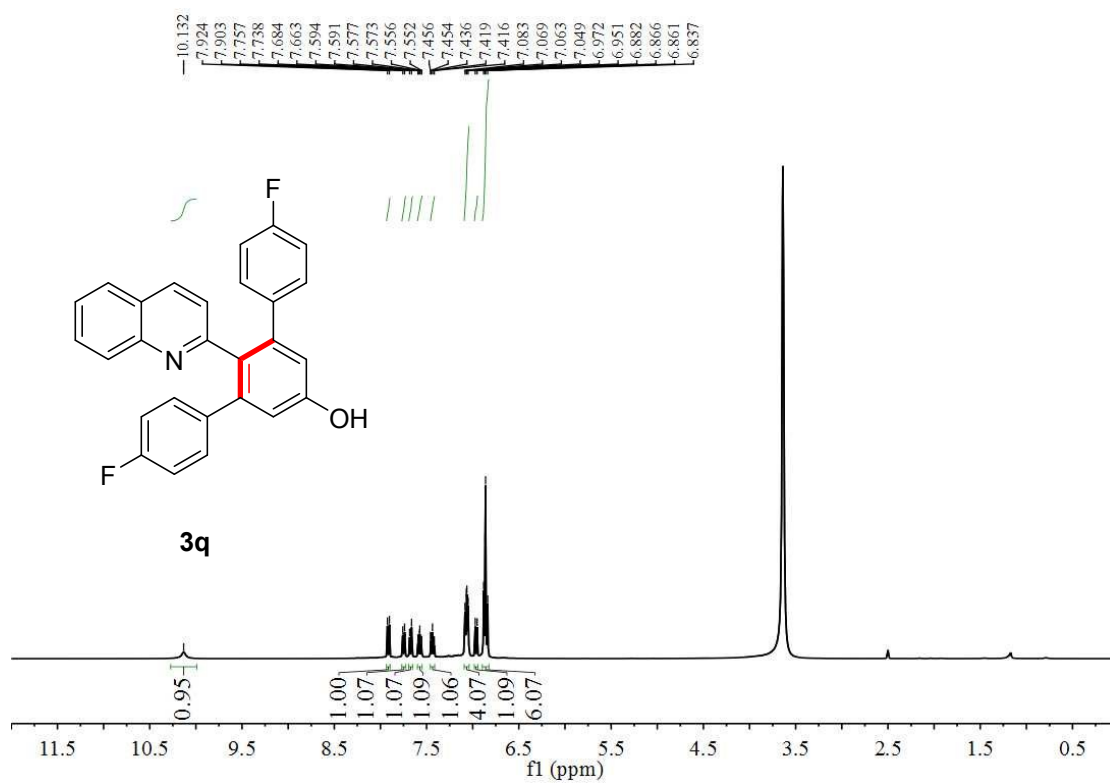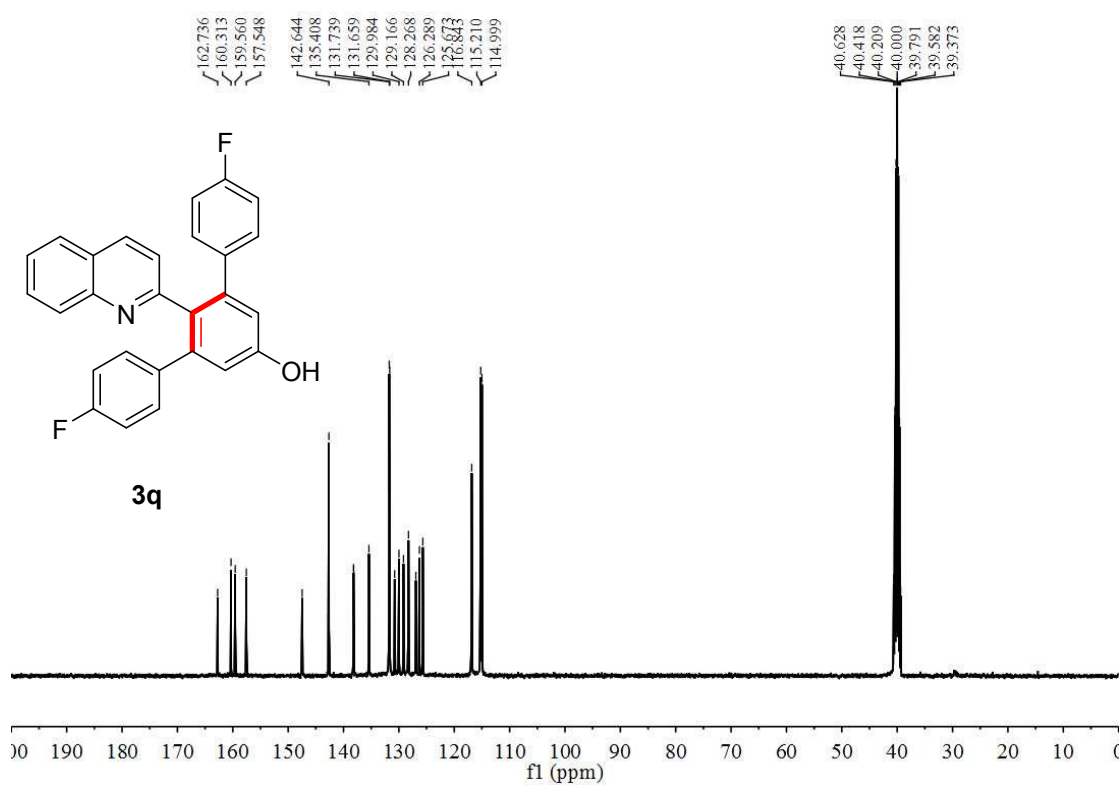

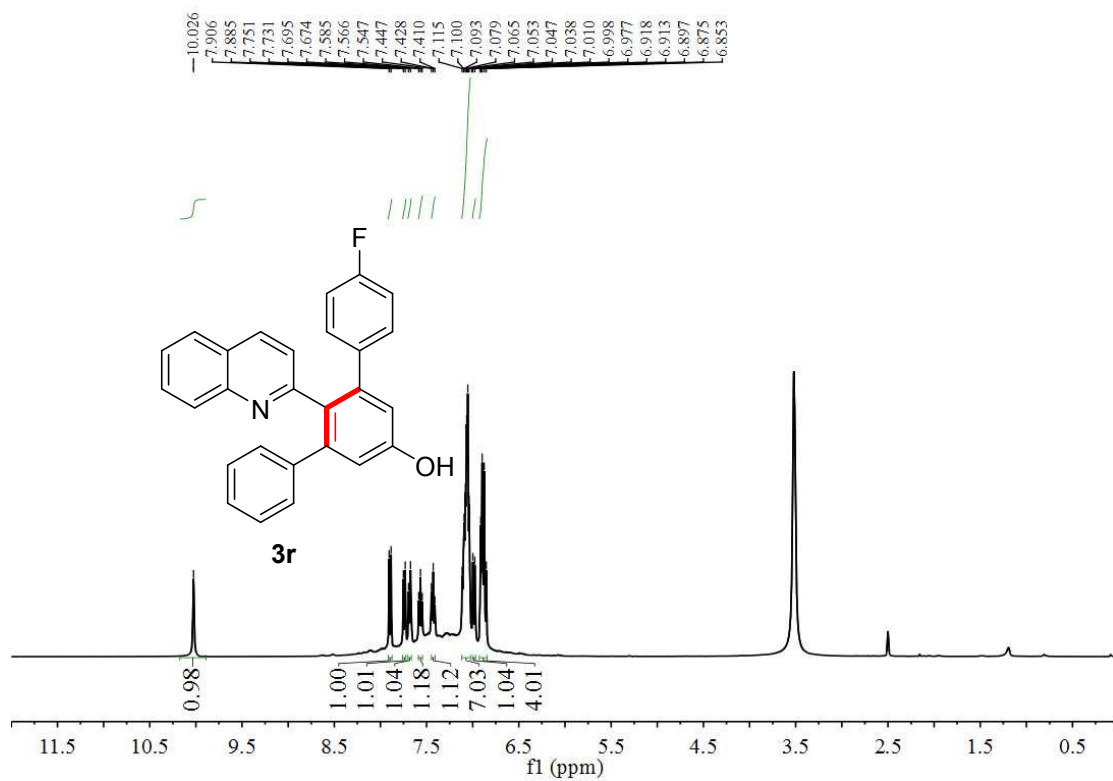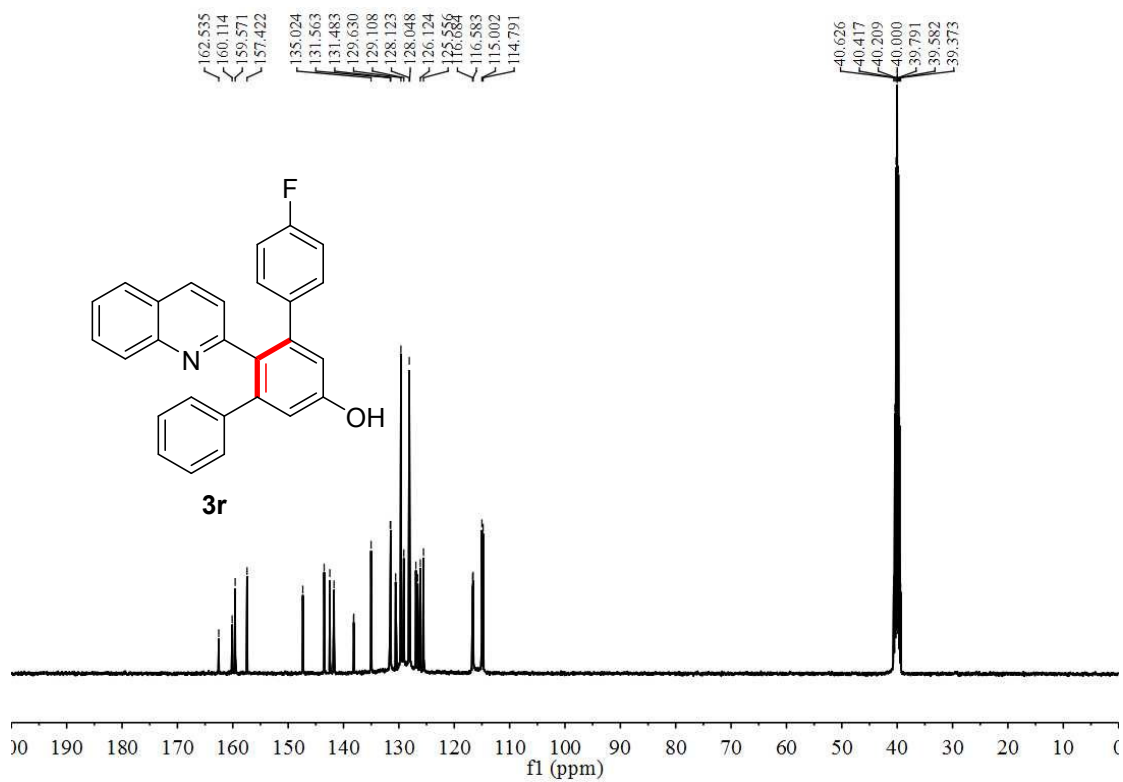

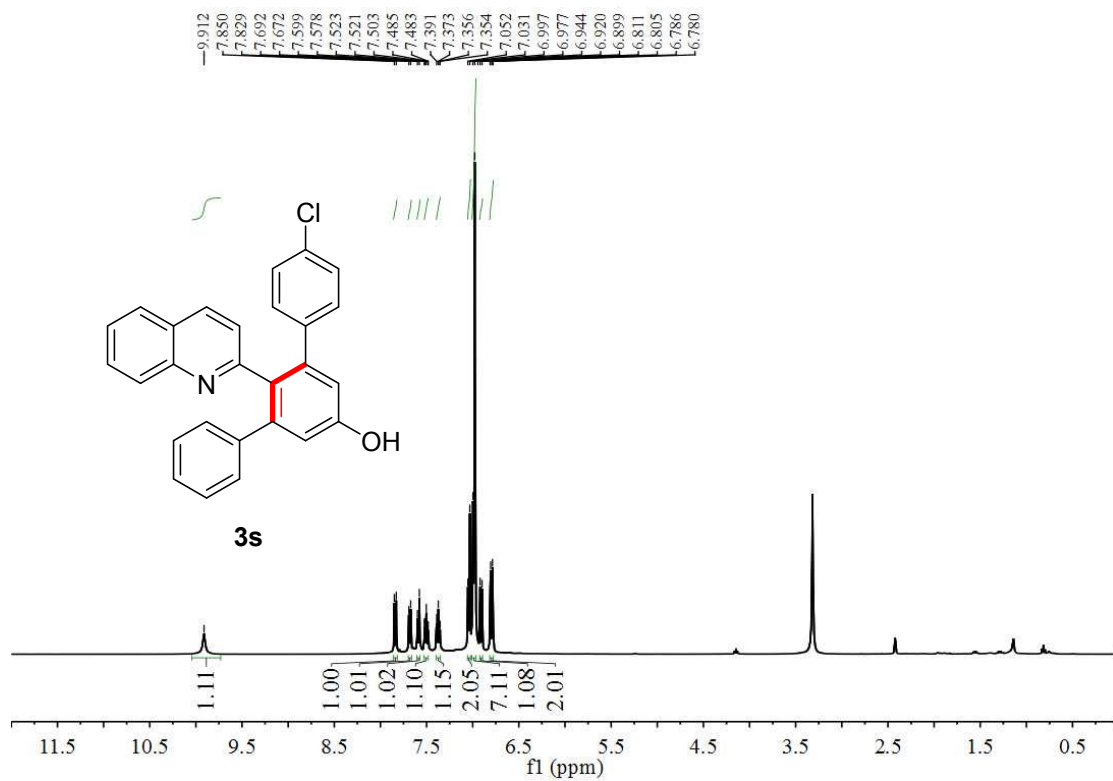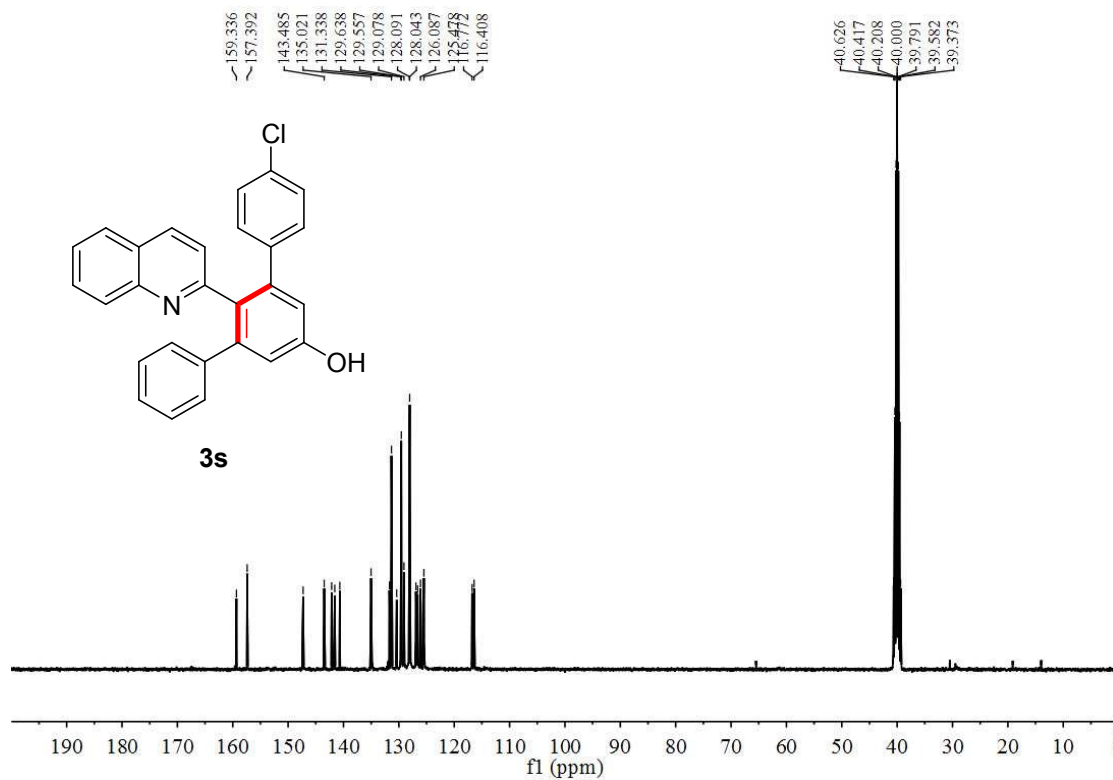

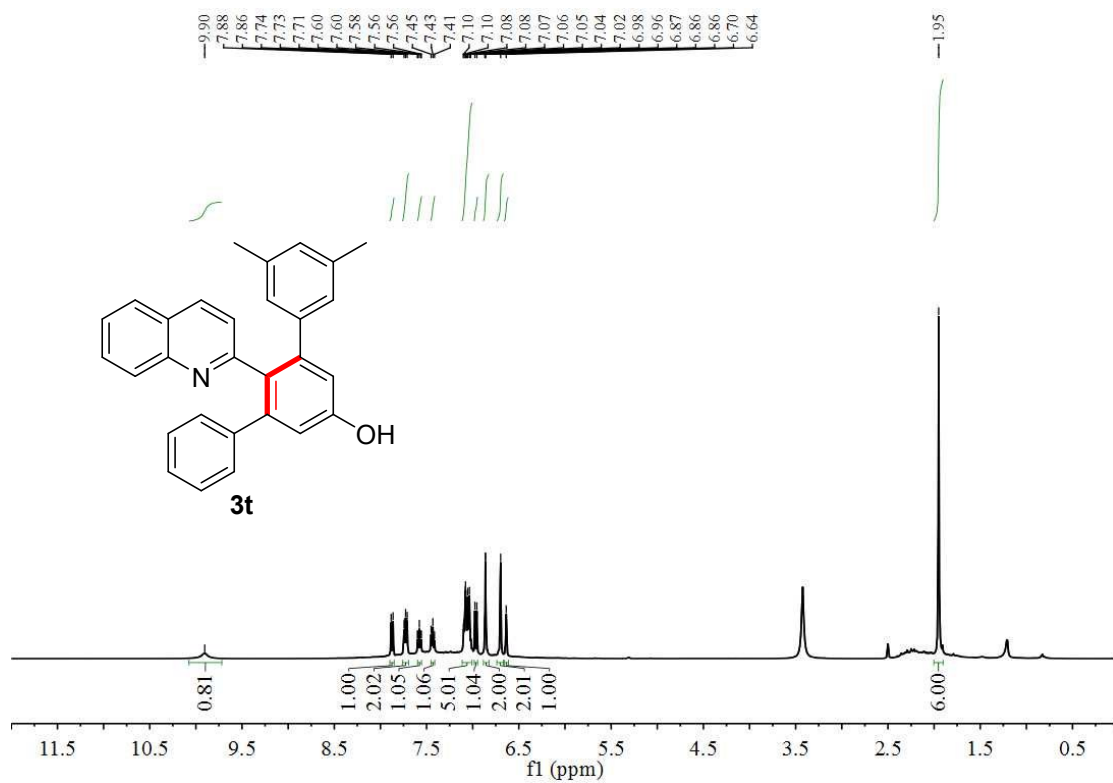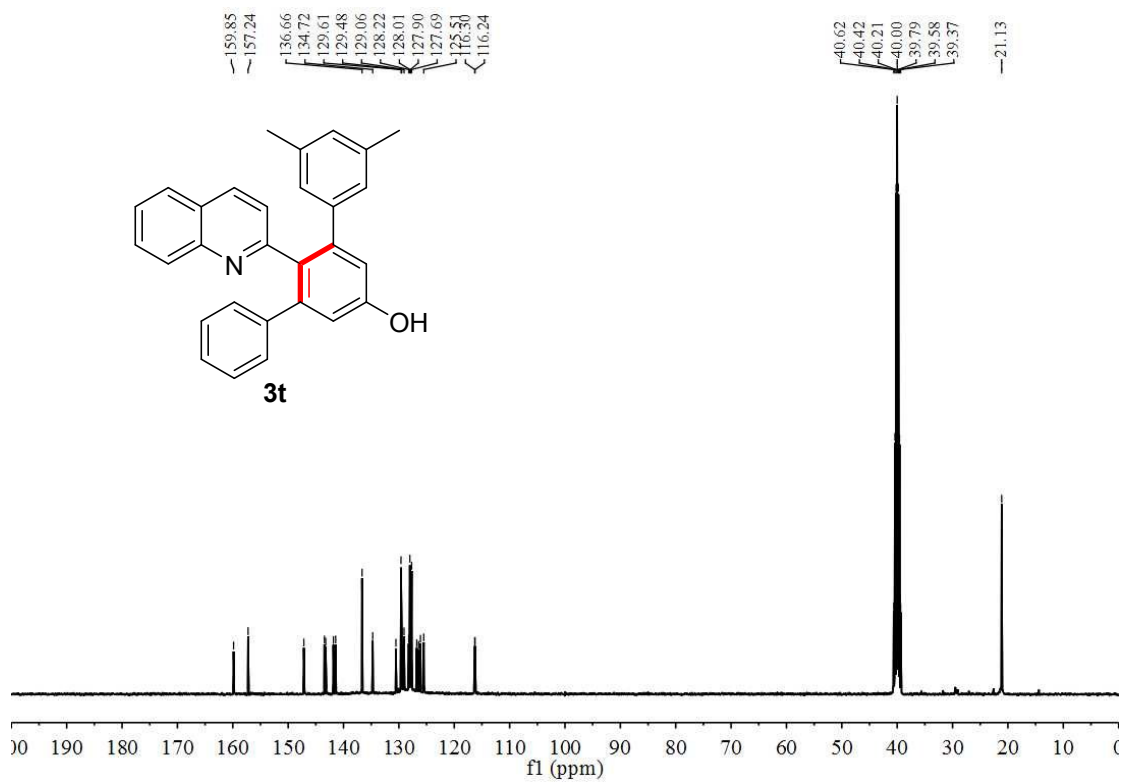

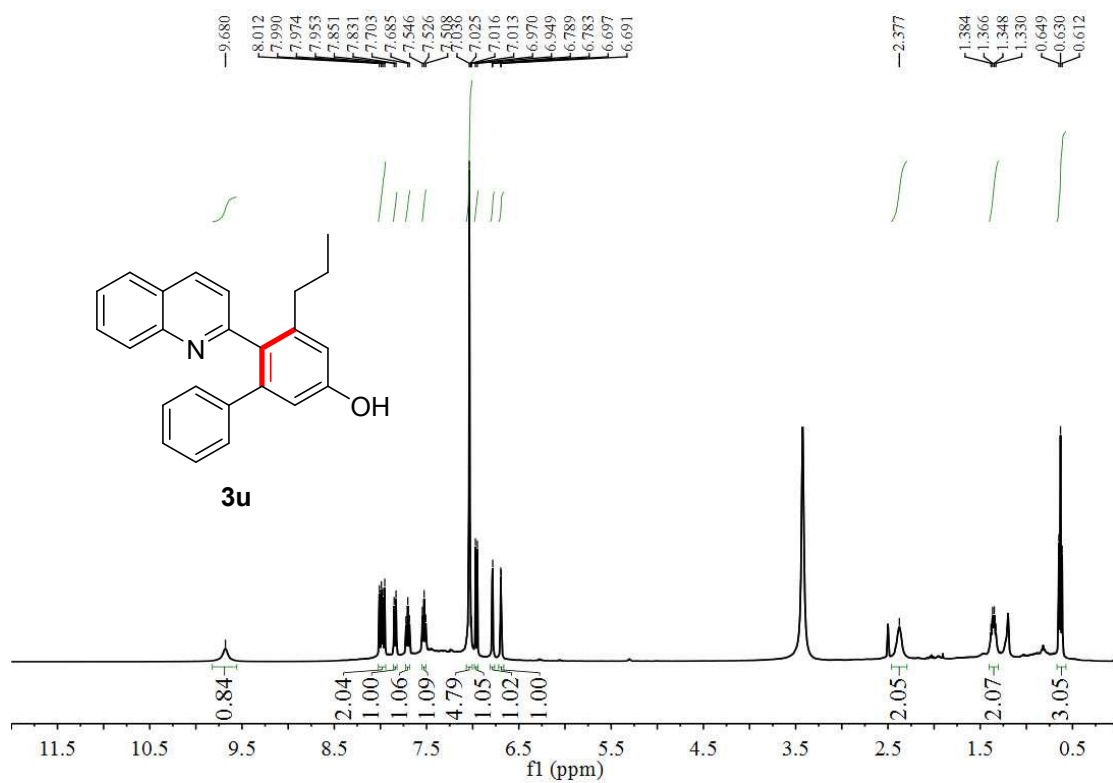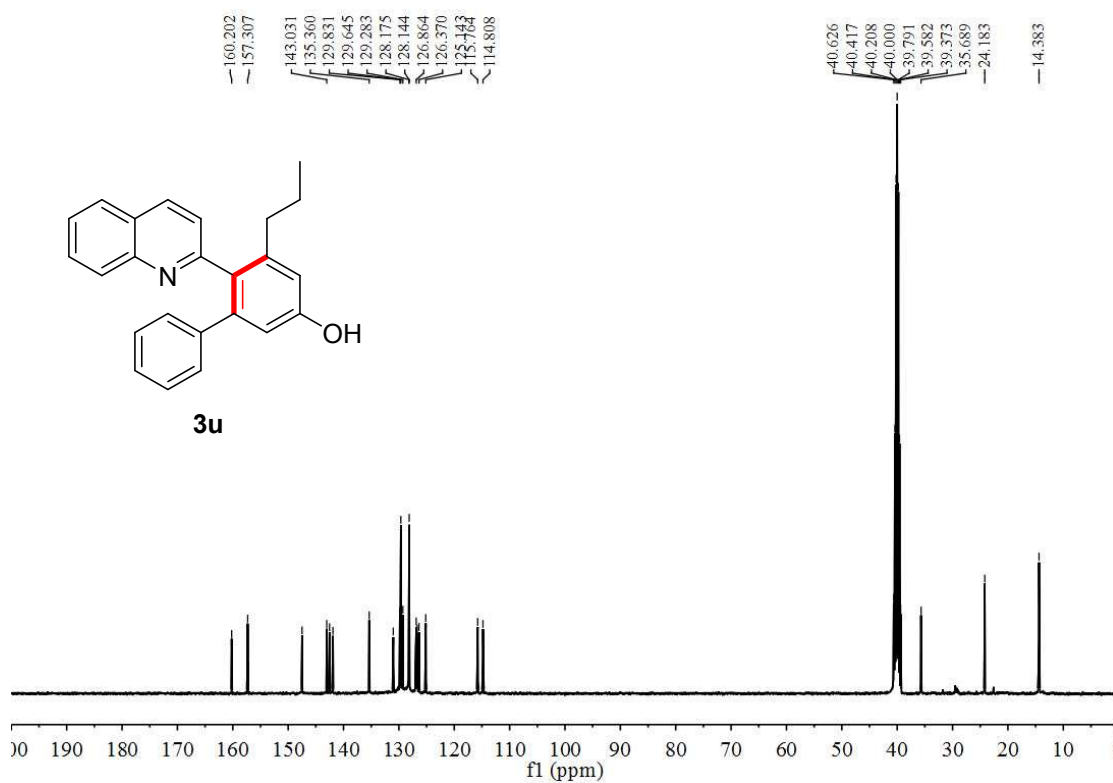

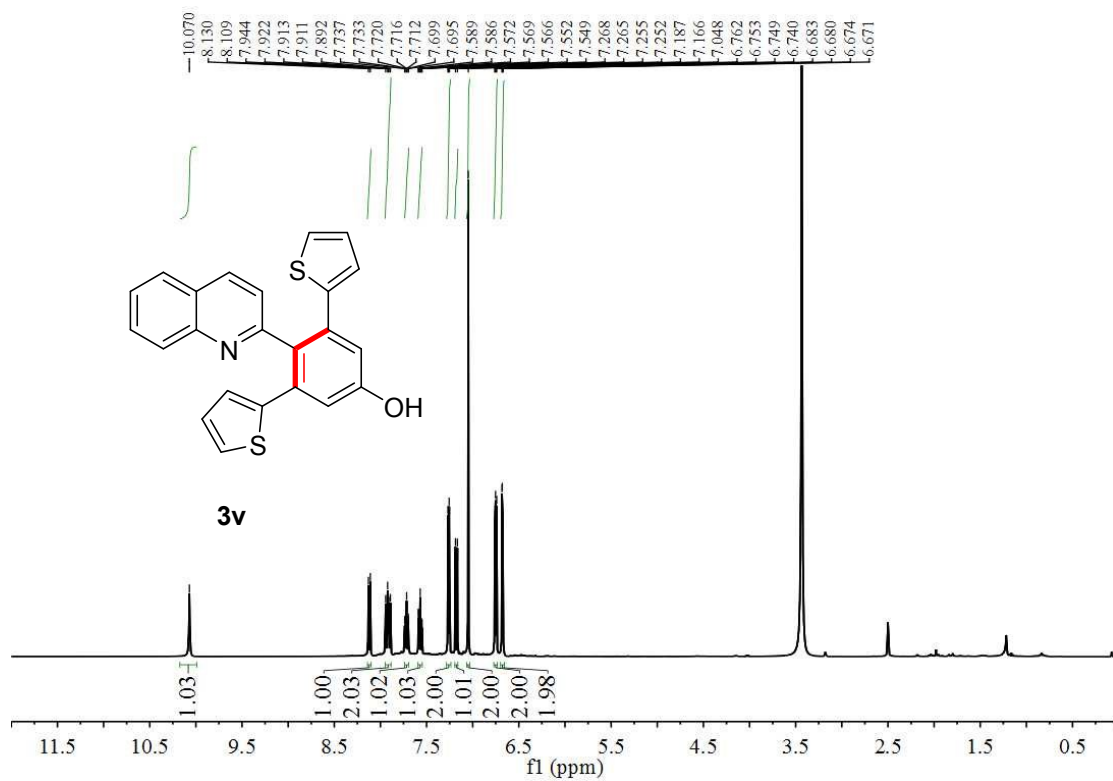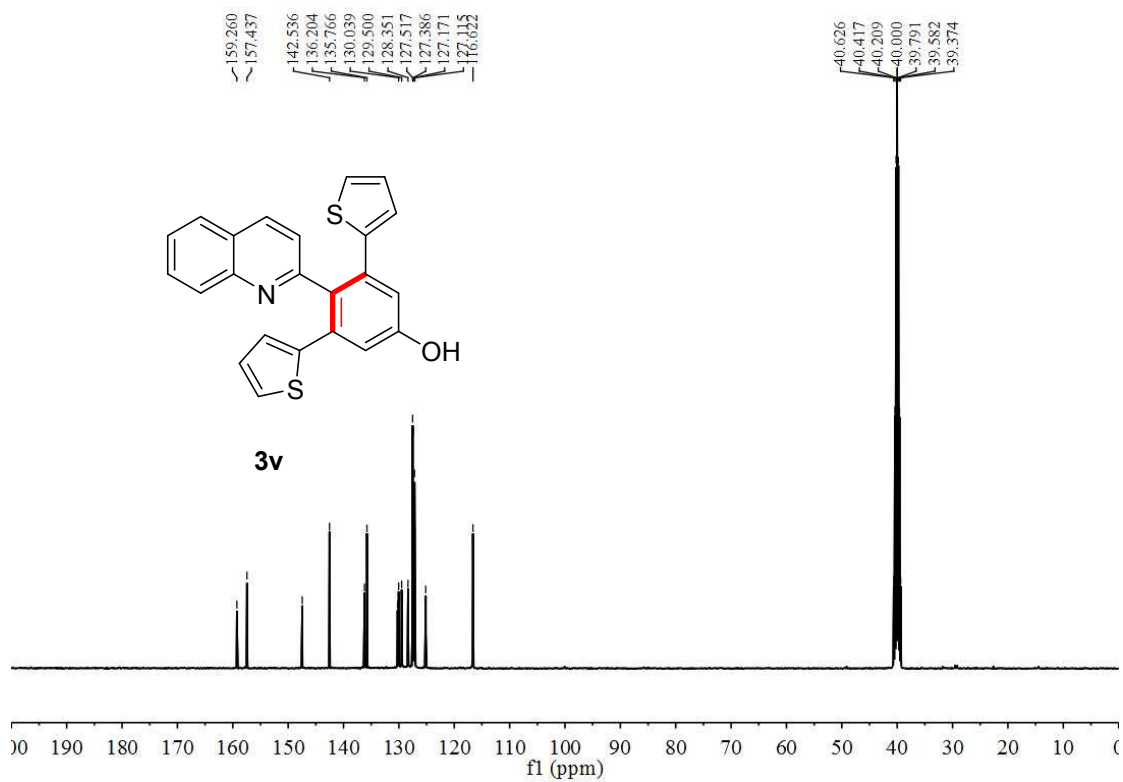



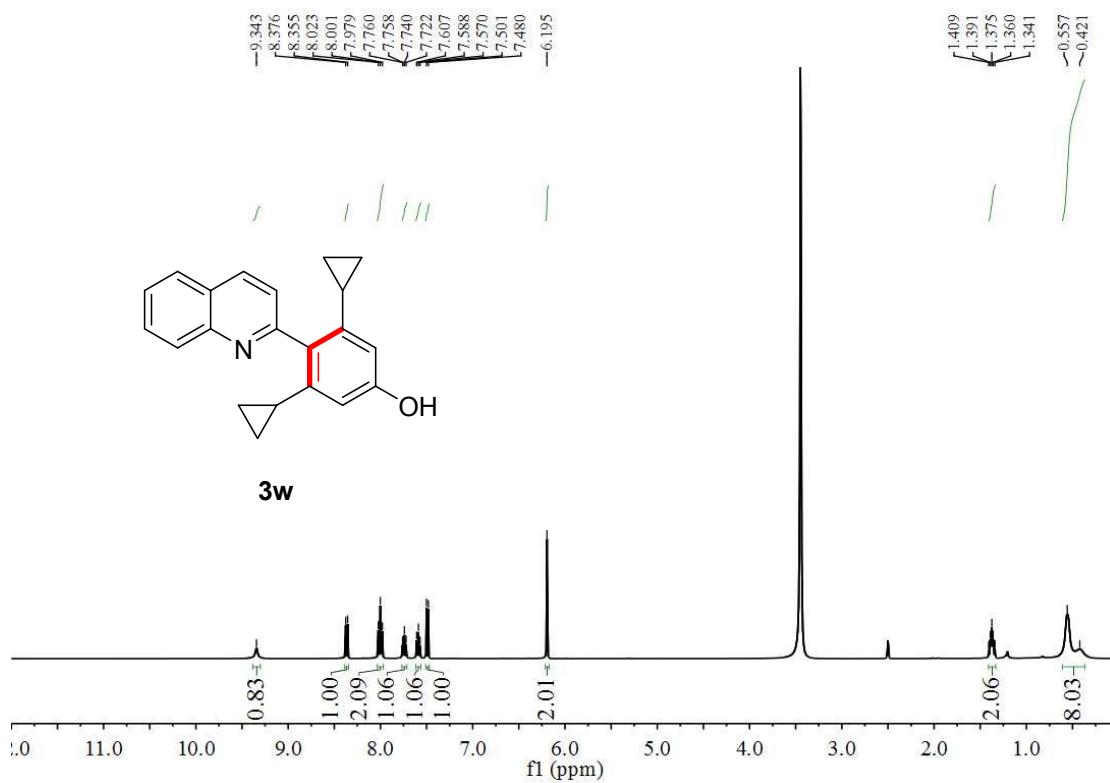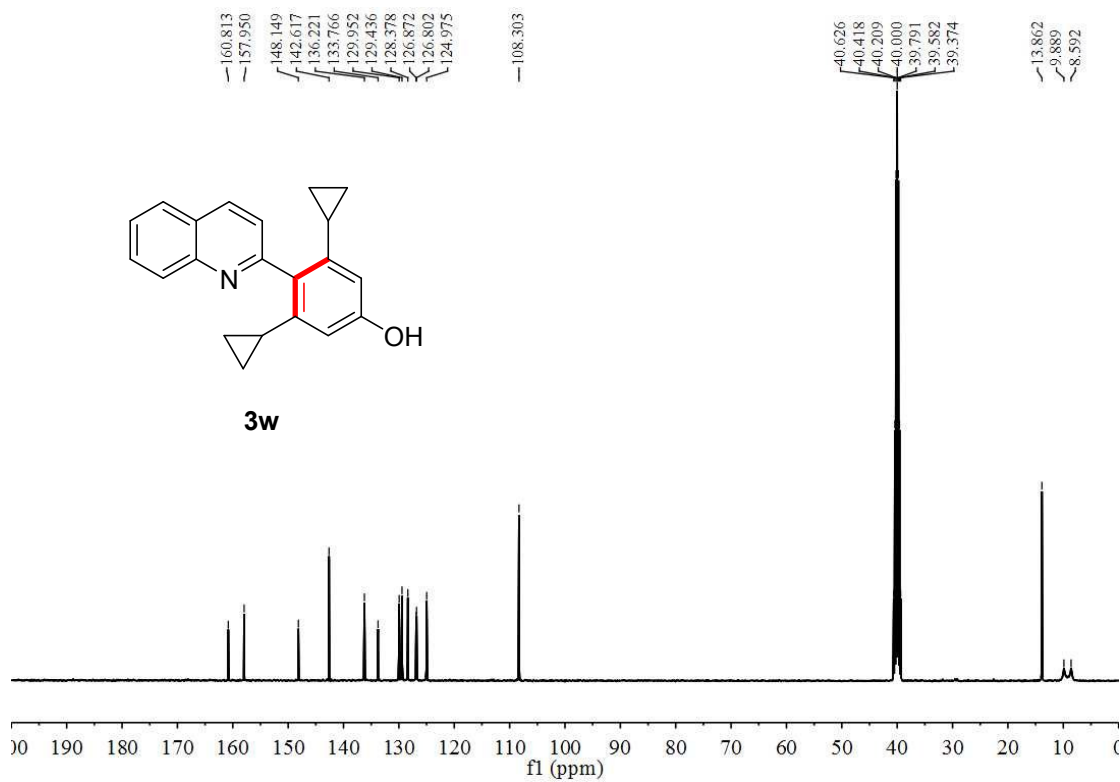

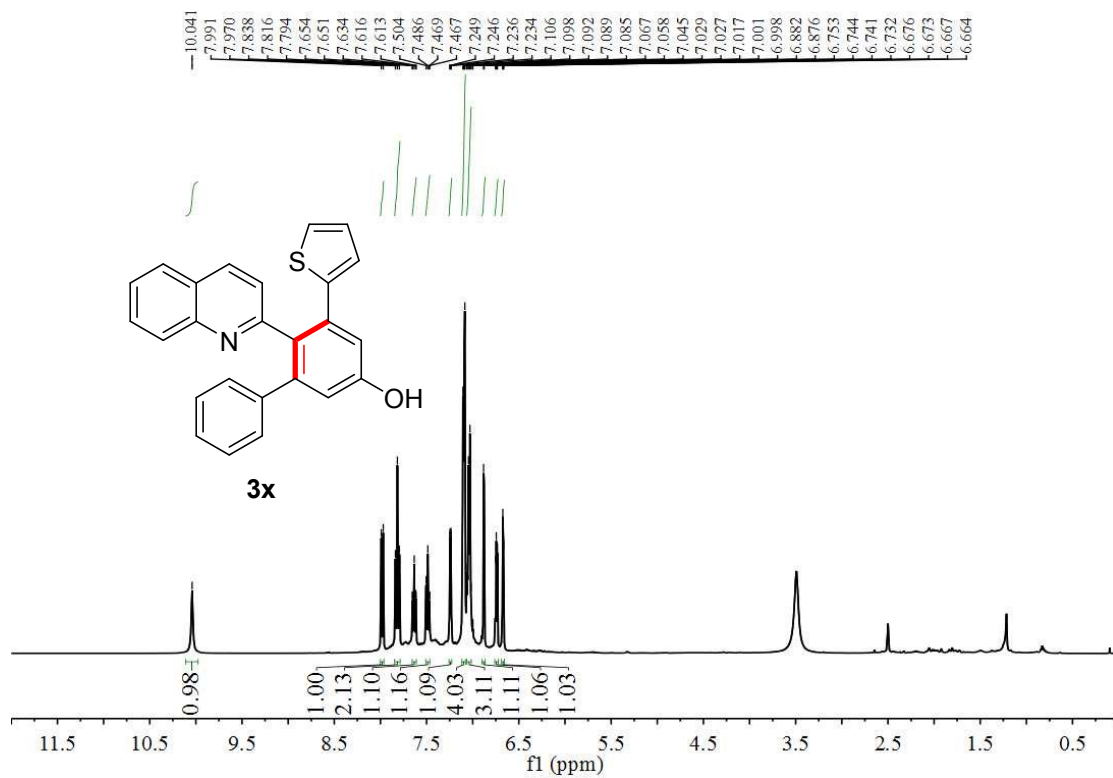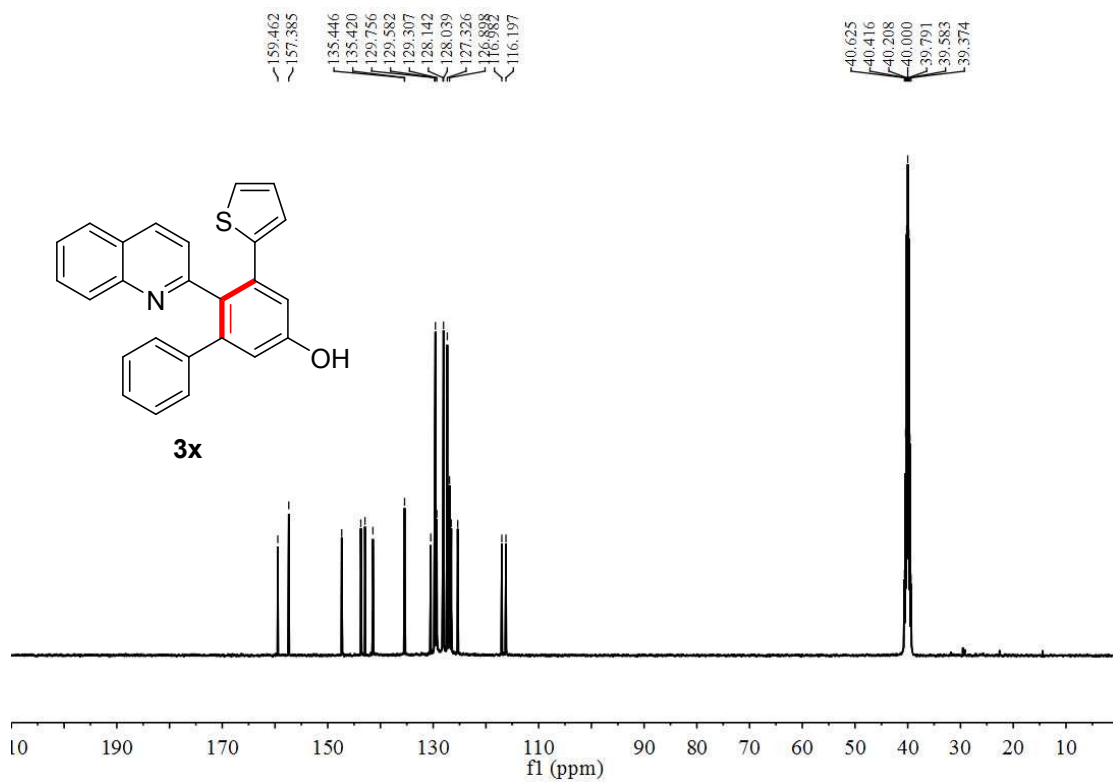

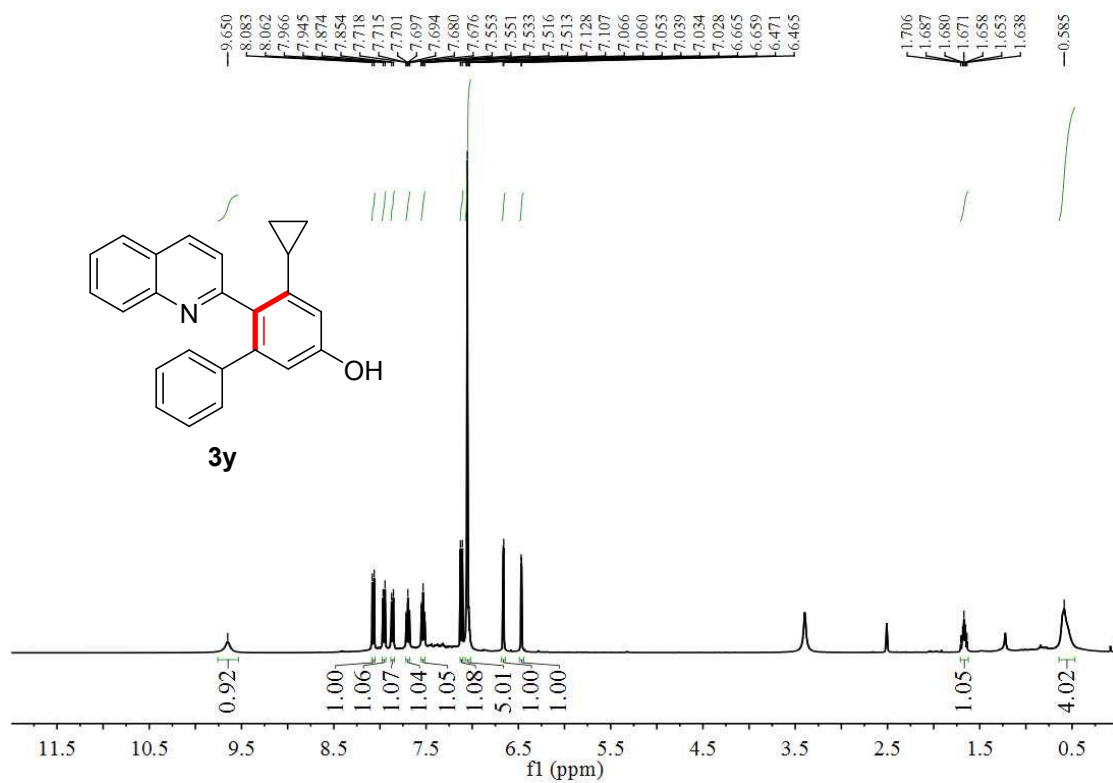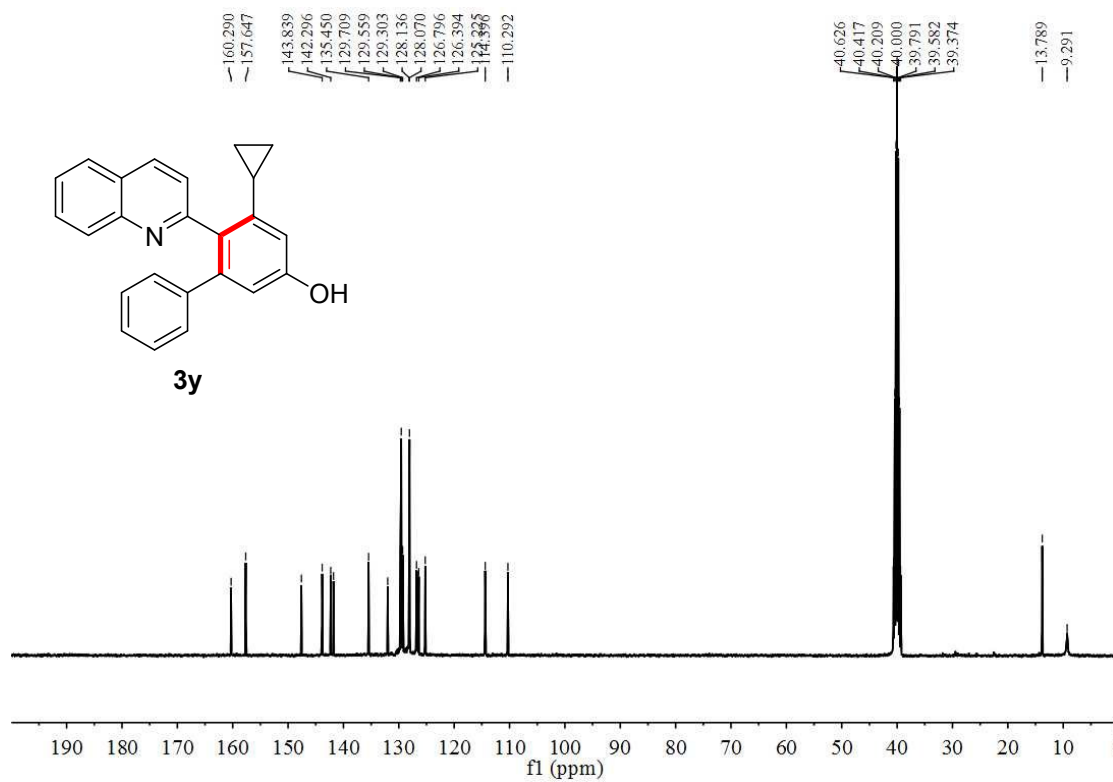

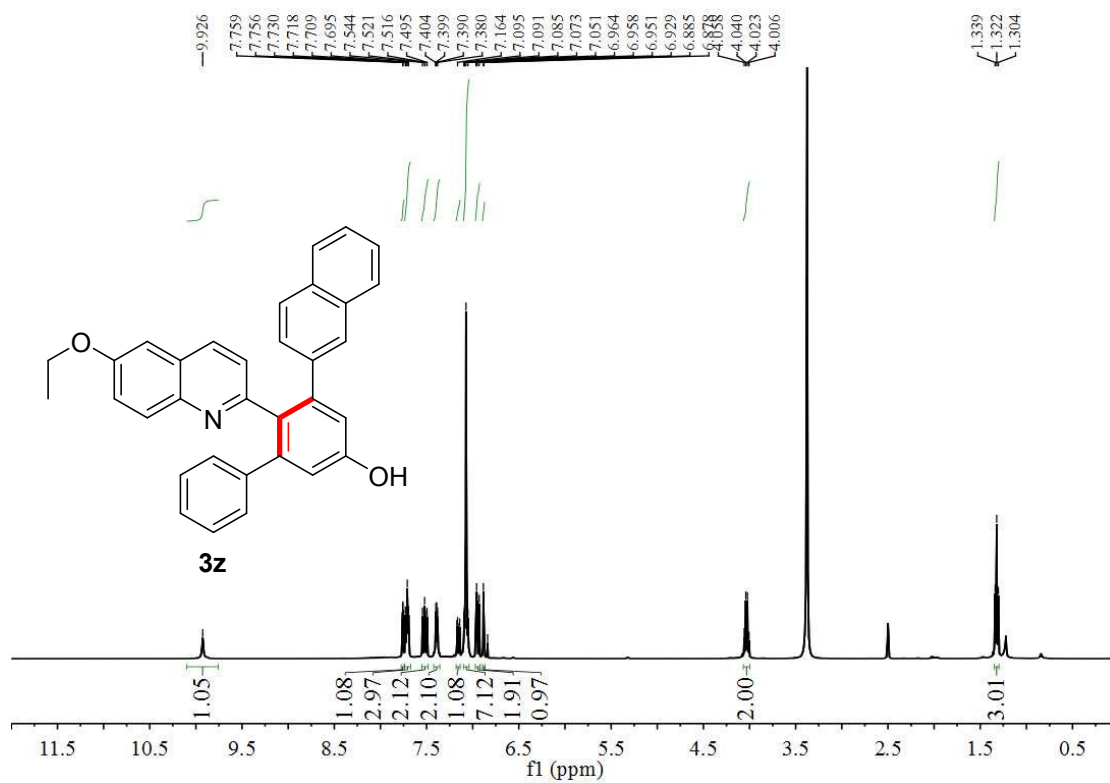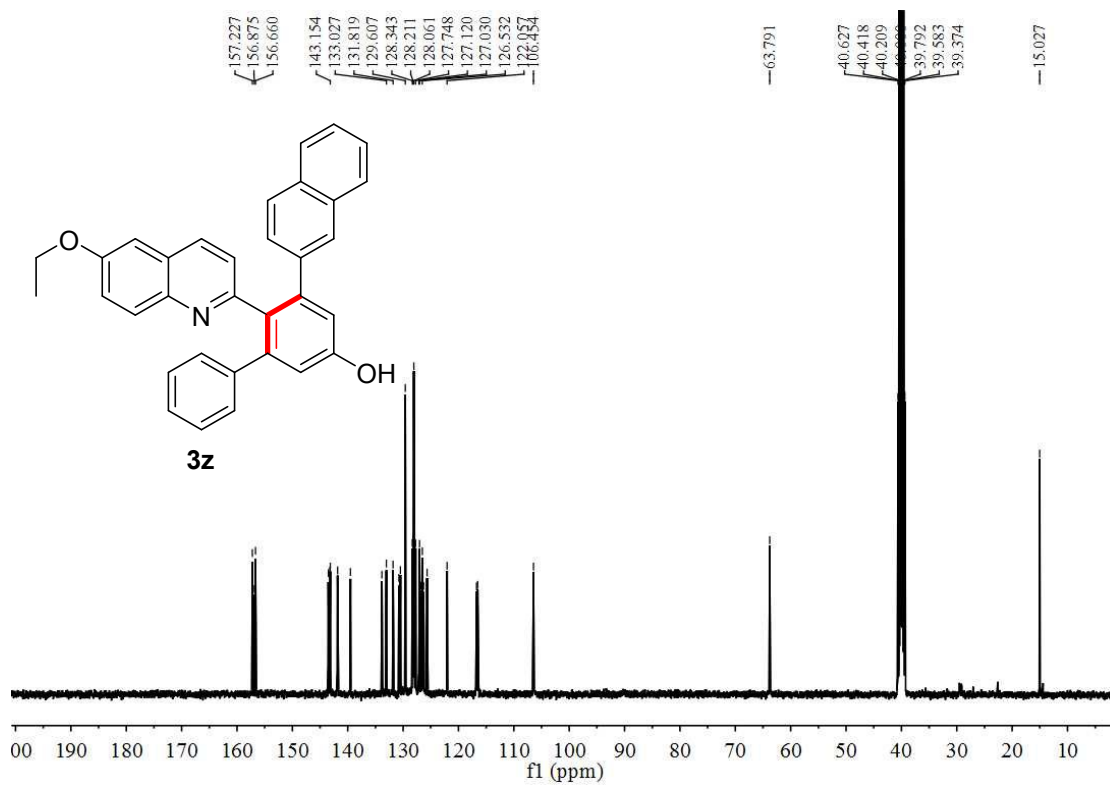

Supplement: RA-008-C7RA12716B-s001.pdf [file RA-008-C7RA12716B-s001.pdf]
